# Supplementary material for: Efficient green light-excited switches based on dithienylethenes with BF2-doped π-conjugated systems
Source: Royal Society of Chemistry journal article supplement (doi:10.1039/c9cc06838d), 2019-01-01
Supplement: c9cc06838d1.pdf [file c9cc06838d1.pdf]

Electronic Supplementary Material (ESI) for ChemComm.

This journal is © The Royal Society of Chemistry 2019

## Supporting Information for

# Efficient Green Light-Excited Switches Based on Dithienylethenes with BF<sub>2</sub>-doped $\pi$ -Conjugated Systems

Ziyong Li,<sup>\*a</sup> Yijie Dai,<sup>a</sup> Zhiqiang Lu,<sup>\*b</sup> Yingying Pei,<sup>a</sup> Hong Chen,<sup>a</sup> Lilei Zhang,<sup>b</sup>  
Ying Duan,<sup>a</sup> Hui Guo<sup>\*b</sup>

<sup>a</sup> Luoyang Key Laboratory of Organic Functional Molecules, School of Food and Drug, Luoyang Normal University, Luoyang, 471934, China

<sup>b</sup> College of Chemistry and Chemical Engineering, and Henan Key Laboratory of Function-Oriented Porous Materials, Luoyang Normal University, Luoyang, 471934, China

Corresponding author E-mail: liziyong@mails.cnu.edu.cn; zqlu2000@163.com;  
guohui0319@nankai.edu.cn.

## Table of Contents

|                                                                            |         |
|----------------------------------------------------------------------------|---------|
| 1. General information.....                                                | S1-S2   |
| 2. Experimental section.....                                               | S2-S5   |
| 3. X-ray crystal structure data of <b>1a</b> .....                         | S5-S11  |
| 4. Photochromism and fluorescent switching behaviors of <b>1a-1d</b> ..... | S11-S18 |
| 5. DFT theoretical calculations of <b>1a-1d</b> .....                      | S19-S20 |
| 6. Confocal fluorescence microscope imaging of <b>1b</b> .....             | S20     |
| 7. Appendix: NMR and Mass spectra.....                                     | S21-S28 |
| 8. REFERENCES.....                                                         | S28-S29 |

## **1. General information**

### **1.1 Materials**

All manipulations are carried out under a nitrogen atmosphere by using standard Schlenk techniques unless otherwise stated. Tetrahydrofuran / toluene are distilled under nitrogen from sodium-benzophenone. The intermediates **4a**<sup>1</sup> and **4b**<sup>2</sup> are prepared by reported literature methods. MCF 7 cell lines are supplied by KeyGen Biotech. Co., Ltd. (China). All other starting materials are obtained commercially as analytical-grade from Energy Chemical Reagent Co., Ltd (Shanghai, China) and used without further purification. The relative quantum yields are determined by comparing the reaction yield with the known yield of 2-bis (2-methyl-5 -phenyl-3-thienyl) perfluorocyclopentene.<sup>3</sup>

### **1.2 Instruments**

<sup>1</sup>H and <sup>13</sup>C NMR spectra are collected on German BRUKER AVANCE III 400 MHz (all the chemical shifts are relative to TMS). High resolution mass spectra are obtained on SCIEX X-500R QTOF (ESI mode). All the absorption spectra are collected on a SHIMADZU UV-2600 UV-Vis spectrophotometer, and the fluorescence spectra are obtained on a Hitachi Model F-4500 fluorescent spectrophotometer. In the photochromic experiments, the visible light irradiation experiment is carried out using a 30 W green lamp (520 - 530 nm), 30 W red lamp (650 - 660 nm) and 30 W near-infrared lamp (800 - 810 nm), respectively. The confocal imaging experiments were subjected with TCS SP8 confocal laser scanning microscope (CLSM) (Leica, Germany).

### **1.3 Preparation of the PMMA film**

The PMMA films are prepared by dissolving **1a-1d** (5.0 mg) and PMMA (100 mg) in CHCl<sub>3</sub> (2 mL), then the uniform solution is coated on the quartz plate (1.0 × 3.0 cm). The PMMA films are dried in air and stored in darkness.

### **1.4 Cell culture and confocal imaging**

The cell experiments are performed as follows: MCF 7 cell lines are seeded in a glass-bottom dish with a density of ca. 5×10<sup>4</sup> cells per dish and incubated in medium of 1640 containing 10% fetal bovine serum (FBS) and 1% antibiotics (100 U mL<sup>-1</sup> penicillin and 100 μg mL<sup>-1</sup> streptomycin) at 37 °C in an atmosphere of 5% CO<sub>2</sub> in air for 24 h. After then, 10 μL solution of sample molecules

**1a** and **1b** in DMSO (1.0 mM) is slowly added to the dish containing the cells and 1.0 mL fresh culture medium. The culture medium is gently agitated along the inner wall of the dish with a pipette to make sample molecules disperse uniformly. Then the cells are incubated for 30 min at ambient temperature. Finally the cells are washed 3 times with PBS (pH = 7.4) to fully remove the uninternalized dyes. The confocal fluorescence microscopy is employed for the data collection. Fluorescence signals are collected at 530 - 750 nm upon excitation at 510 nm. The switchable irradiation experiments are conducted on green light at 520 - 530 nm and red light at 650 - 660 nm for 2 min respectively.

## 2. Experimental section

### 2.1 Scheme S1. Synthesis route of dithienylethenes **1a-1d**.

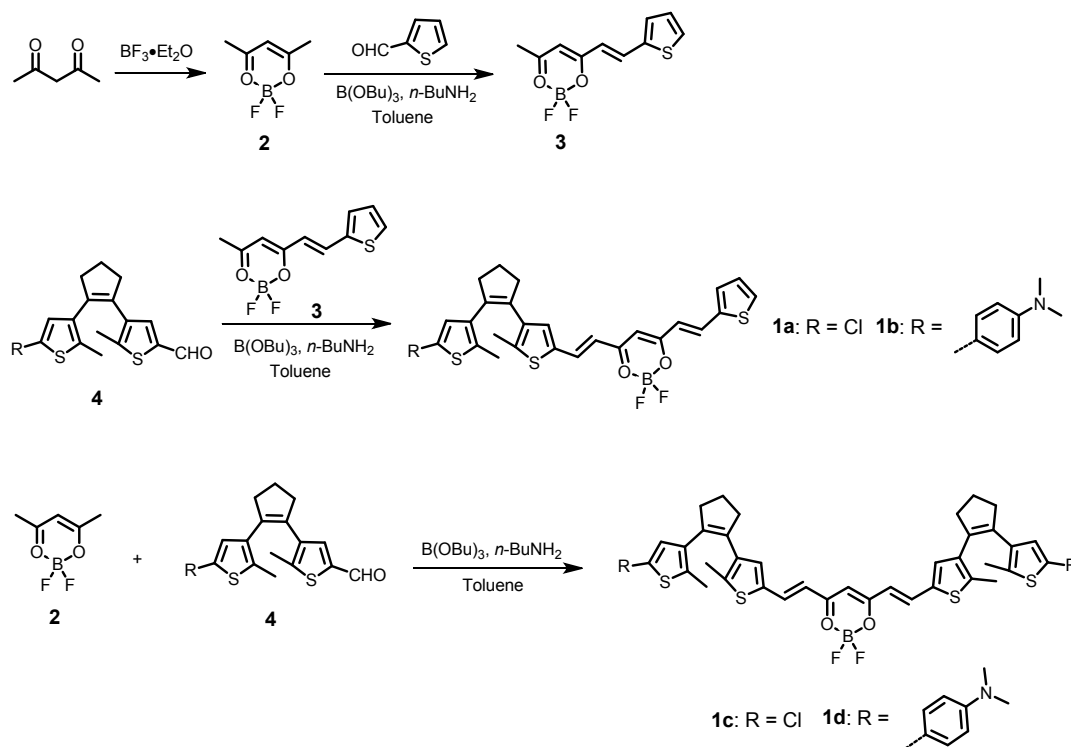

### 2.2 Synthesis and characterization

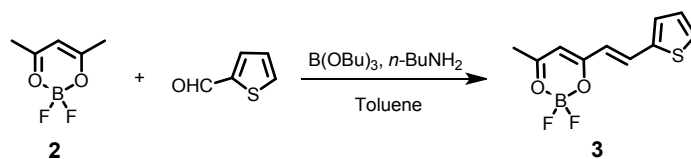

The solution of pentane-2, 4-dione (200 mg, 2.0 mmol) and  $\text{BF}_3 \cdot \text{OEt}_2$  (0.26 mL, 2.0 mmol, 47%) in toluene (5 mL) is stirred at 65 °C for 2 h. Then the solution of thiophene-2-carbaldehyde (224

mg, 2.0 mmol) in toluene (2 mL) is added into the above reaction mixture, followed by B(OBu)<sub>3</sub> (0.81 mL, 3.0 mmol). The resulting solution is stirred for 30 min and *n*-butylamine (50 μL, 0.5 mmol) is slowly added, and stirred at 65 °C for 24 h. After cooling to room temperature, upon removal of solvent under reduced pressure and purified by column chromatography (silica gel: 200-300, PE : DCM = 1 : 1) to obtain the intermediate **3** as an orange solid (Yield: 56 %). <sup>1</sup>H NMR (400 MHz, CDCl<sub>3</sub>) δ 8.19 (d, *J* = 15.2 Hz, 1H), 7.57 (d, *J* = 5.0 Hz, 1H), 7.44 (d, *J* = 3.6 Hz, 1H), 7.16 - 7.14 (m, 1H), 6.41 (d, *J* = 15.2 Hz, 1H), 5.96 (s, 1H), 2.33 (s, 3H). <sup>13</sup>C NMR (100 MHz, CDCl<sub>3</sub>) δ 191.23, 180.32, 140.82, 139.65, 134.52, 132.10, 129.19, 118.53, 101.45, 24.49. HRMS (ESI-TOF) *m/z*: [M + Na]<sup>+</sup> Calcd for C<sub>10</sub>H<sub>9</sub>BF<sub>2</sub>NaO<sub>2</sub>S 265.0282; Found 265.0285.

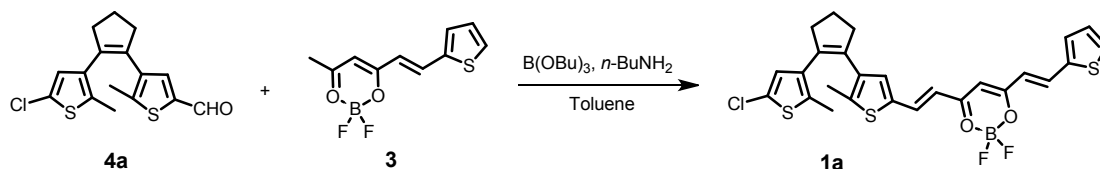

To a solution of intermediate **4a** (323 mg, 1.0 mmol) and **3** (242 mg, 1.0 mmol) in toluene (3 mL) is added B(OBu)<sub>3</sub> (0.41 mL, 1.5 mmol) and *n*-butylamine (25 μL, 0.25 mmol), and the resulting solution is stirred at 65 °C for 24 h. After cooling to room temperature, the solution is concentrated under reduced pressure and the residue is purified by column chromatography (silica gel: 200-300, PE : DCM = 1 : 2) to obtain the target compound **1a** as a brown solid (Yield: 61 %). <sup>1</sup>H NMR (400 MHz, CDCl<sub>3</sub>) δ 8.12 (d, *J* = 15.2 Hz, 1H), 8.01 (d, *J* = 15.2 Hz, 1H), 7.53 (d, *J* = 4.5 Hz, 1H), 7.40 (d, *J* = 4.5 Hz, 1H), 7.14 - 7.12 (m, 1H), 7.10 (s, 1H), 6.58 (s, 1H), 6.47 (d, *J* = 15.2 Hz, 1H), 6.29 (d, *J* = 15.2 Hz, 1H), 5.95 (s, 1H), 2.79 - 2.73 (m, 4H), 2.10 - 2.06 (m, 2H), 2.05 (s, 3H), 1.85 (s, 3H). <sup>13</sup>C NMR (100 MHz, CDCl<sub>3</sub>) δ 179.27, 178.43, 143.43, 139.93, 139.73, 138.86, 138.18, 136.03, 135.93, 135.56, 134.57, 133.82, 133.63, 133.33, 131.27, 128.89, 126.53, 125.61, 119.46, 117.93, 101.82, 38.38, 38.27, 22.82, 15.23, 14.10. HRMS (ESI-TOF) *m/z*: [M + H]<sup>+</sup> Calcd for C<sub>26</sub>H<sub>23</sub>BClF<sub>2</sub>O<sub>2</sub>S<sub>3</sub> 547.0610; Found 547.0612; [M + Na]<sup>+</sup> Calcd for C<sub>26</sub>H<sub>22</sub>BClF<sub>2</sub>NaO<sub>2</sub>S<sub>3</sub> 569.0429; Found 569.0445.

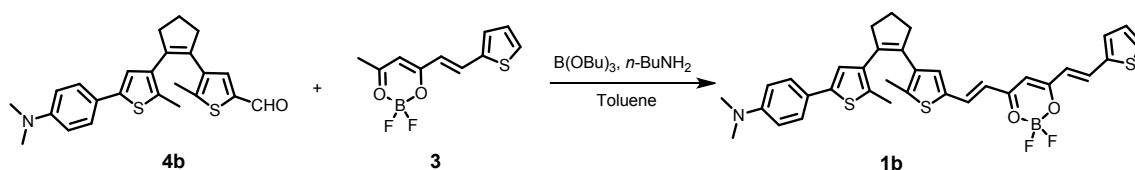

To a solution of intermediate **4b** (407 mg, 1.0 mmol) and **3** (242 mg, 1.0 mmol) in toluene (3 mL) is added B(OBu)<sub>3</sub> (0.41 mL, 1.5 mmol) and *n*-butylamine (25 μL, 0.25 mmol), and the resulting solution is stirred at 65 °C for 48 h. After cooling to room temperature, the solution is concentrated under reduced pressure and the residue is purified by column chromatography (silica gel: 200-300, PE : DCM = 1 : 4) to obtain the target compound **1b** as a brown solid (Yield: 48 %). <sup>1</sup>H NMR (400 MHz, CDCl<sub>3</sub>) δ 8.13 (d, *J* = 15.2 Hz, 1H), 8.05 (d, *J* = 15.1 Hz, 1H), 7.54 (d, *J* = 4.6 Hz, 1H), 7.39 (d, *J* = 8.9 Hz, 3H), 7.19 (s, 1H), 7.15 - 7.13 (m, 1H), 6.82 (s, 1H), 6.73 (d, *J* = 8.5 Hz, 2H), 6.48 (d, *J* = 15.2 Hz, 1H), 6.30 (d, *J* = 15.1 Hz, 1H), 5.96 (s, 1H), 2.99 (s, 6H), 2.86 - 2.80 (m, 4H), 2.15 - 2.09 (m, 2H), 2.06 (s, 3H), 1.97 (s, 3H). <sup>13</sup>C NMR (100 MHz, CDCl<sub>3</sub>) δ 179.52, 178.31, 149.99, 144.04, 141.16, 140.13, 138.87, 138.77, 137.01, 136.33, 135.96, 133.66, 132.81, 132.40, 131.31, 129.02, 126.43, 123.02, 121.49, 119.69, 117.83, 112.75, 101.93, 40.65, 38.63, 38.45, 23.09, 15.44, 14.41. HRMS (ESI-TOF) *m/z*: [M + H]<sup>+</sup> Calcd for C<sub>34</sub>H<sub>33</sub>BF<sub>2</sub>NO<sub>2</sub>S<sub>3</sub> 632.1735; Found 632.1725.

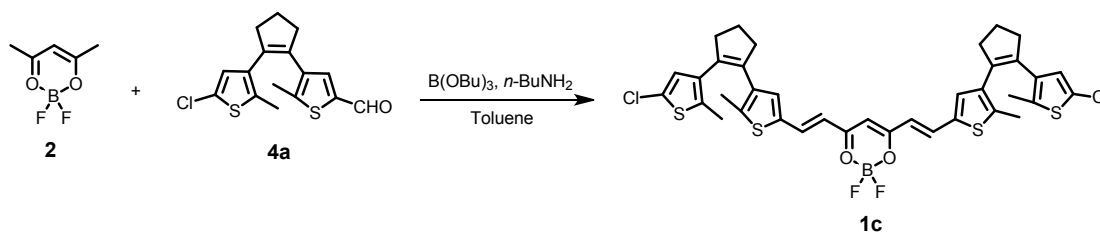

The solution of pentane-2, 4-dione (100 mg, 1.0 mmol) and BF<sub>3</sub>·OEt<sub>2</sub> (0.13 mL, 1.0 mmol, 47%) in toluene (3 mL) is stirred at 65 °C for 2 h. Then the solution of intermediate **4a** (646 mg, 2.0 mmol) in toluene (3 mL) is added into the above reaction mixture, followed by B(OBu)<sub>3</sub> (0.81 mL, 3.0 mmol). The resulting solution is stirred for 30 min and *n*-butylamine (50 μL, 0.5 mmol) is slowly added, and stirred at 65 °C for 24 h. After cooling to room temperature, the solution is concentrated under reduced pressure and the residue is purified by column chromatography (silica gel: 200-300, PE : DCM = 1 : 2) to obtain the target compound **1c** as a brown solid (Yield: 55 %). <sup>1</sup>H NMR (400 MHz, CDCl<sub>3</sub>) δ 7.98 (d, *J* = 15.0 Hz, 2H), 7.08 (s, 2H), 6.58 (s, 2H), 6.27 (d, *J* = 15.0 Hz, 2H), 5.90 (s, 1H), 2.78 - 2.73 (m, 8H), 2.09 - 2.06 (m, 4H), 2.05 (s, 6H), 1.85 (s, 6H). <sup>13</sup>C NMR (100 MHz, CDCl<sub>3</sub>) δ 178.69, 143.20, 139.38, 138.25, 136.28, 135.83, 135.64, 134.75, 134.03, 133.49, 126.69, 125.76, 118.25, 101.89, 38.55, 38.45, 29.84, 22.99, 15.39, 14.28. HRMS (MALDI-TOF) *m/z*: [M + Na]<sup>+</sup> Calcd for C<sub>37</sub>H<sub>33</sub>BCl<sub>2</sub>F<sub>2</sub>NaO<sub>2</sub>S<sub>4</sub> 779.0699; Found 779.0702.

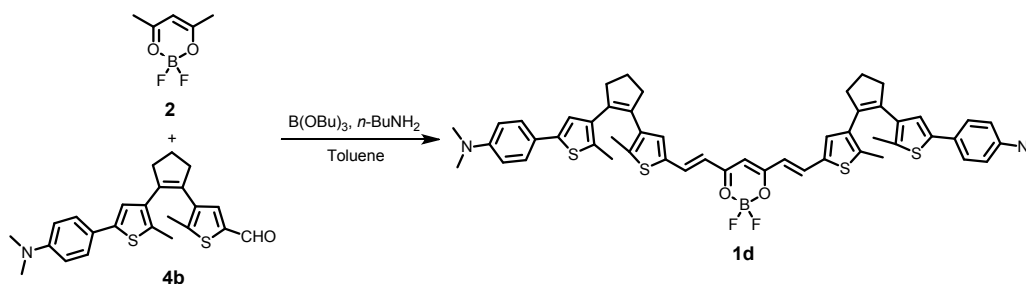

The solution of pentane-2, 4-dione (100 mg, 1.0 mmol) and  $\text{BF}_3 \cdot \text{OEt}_2$  (0.13 mL, 1.0 mmol, 47%) in toluene (3 mL) is stirred at 65 °C for 2 h. Then the solution of intermediate **4b** (815 mg, 2.0 mmol) in toluene (4 mL) is added into the above reaction mixture, followed by  $\text{B(OBu)}_3$  (0.81 mL, 3.0 mmol). The resulting solution is stirred for 30 min and *n*-butylamine (50  $\mu\text{L}$ , 0.5 mmol) is slowly added, and stirred at 65 °C for 48 h. After cooling to room temperature, the solution is concentrated under reduced pressure and the residue is purified by column chromatography (silica gel: 200-300, PE : DCM = 1 : 5) to obtain the target compound **1d** as a brown solid (Yield: 43 %).

$^1\text{H}$  NMR (400 MHz,  $\text{CDCl}_3$ )  $\delta$  7.98 (d,  $J = 15.1$  Hz, 2H), 7.36 (d,  $J = 8.6$  Hz, 4H), 7.14 (s, 2H), 6.81 (s, 2H), 6.69 (d,  $J = 8.7$  Hz, 4H), 6.25 (d,  $J = 15.1$  Hz, 2H), 5.87 (s, 1H), 2.95 (s, 12H), 2.83 - 2.78 (m, 8H), 2.11 - 2.04 (m, 4H), 2.02 (s, 6H), 1.94 (s, 6H).  $^{13}\text{C}$  NMR (100 MHz,  $\text{CDCl}_3$ )  $\delta$  178.61, 149.99, 143.45, 141.14, 139.43, 138.74, 136.91, 136.07, 135.99, 135.91, 132.90, 132.43, 126.45, 123.09, 121.53, 118.07, 112.78, 101.75, 40.68, 38.64, 38.47, 23.10, 15.40, 14.42. HRMS (MALDI-TOF)  $m/z$ :  $[\text{M} + \text{Na}]^+$  Calcd for  $\text{C}_{53}\text{H}_{53}\text{BF}_2\text{N}_2\text{NaO}_2\text{S}_4$  949.2949; Found 949.2948.

### 3. X-ray crystal structure data of 1a

Crystalline powder of complex **1a** suitable for X-ray structural analysis is obtained by slow evaporation of their chloroform / hexane mixed solutions. A crystal with approximate dimensions of  $0.18 \times 0.18 \times 0.18 \text{ mm}^3$  for **1a** is mounted on a glass fiber for diffraction experiment. Intensity data are collected on a Nonius Kappa CCD diffractometer with  $\text{MoK}\alpha$  radiation (0.71073 Å) at 293.43 (10) K. All non-H atoms are refined anisotropically. The hydrogen atoms were placed in the ideal positions and refined as riding atoms. Crystallographic data for the structure in this paper have been deposited with the Cambridge Crystallographic Data Centre as supplemental publication CCDC 1942422.

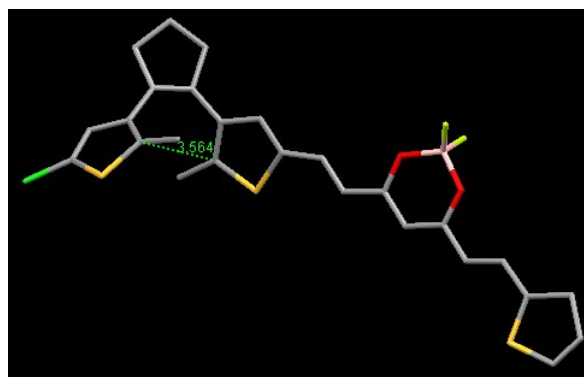

**Figure S1.** The intramolecular distance between the two reactive carbons of of dithienylethene **1a**.

**Table S1.** Crystal data and structure refinement for **1a**.

| Identification code                         | <b>1a</b>                                                                       |
|---------------------------------------------|---------------------------------------------------------------------------------|
| Empirical formula                           | C <sub>26</sub> H <sub>22</sub> BClF <sub>2</sub> O <sub>2</sub> S <sub>3</sub> |
| Formula weight                              | 546.87                                                                          |
| Temperature/K                               | 293.43(10)                                                                      |
| Crystal system                              | triclinic                                                                       |
| Space group                                 | P-1                                                                             |
| a/Å                                         | 8.0044(5)                                                                       |
| b/Å                                         | 11.4822(8)                                                                      |
| c/Å                                         | 16.6812(11)                                                                     |
| α/°                                         | 80.569(6)                                                                       |
| β/°                                         | 84.056(5)                                                                       |
| γ/°                                         | 72.088(6)                                                                       |
| Volume/Å <sup>3</sup>                       | 1436.80(17)                                                                     |
| Z                                           | 2                                                                               |
| ρ <sub>calc</sub> /cm <sup>3</sup>          | 1.264                                                                           |
| μ/mm <sup>-1</sup>                          | 0.384                                                                           |
| F(000)                                      | 564.0                                                                           |
| Crystal size/mm <sup>3</sup>                | 0.18 × 0.18 × 0.18                                                              |
| Radiation                                   | MoKα (λ = 0.71073)                                                              |
| 2θ range for data collection/°              | 6.632 to 56.588                                                                 |
| Index ranges                                | -9 ≤ h ≤ 10, -12 ≤ k ≤ 14, -17 ≤ l ≤ 20                                         |
| Reflections collected                       | 11315                                                                           |
| Independent reflections                     | 5979 [R <sub>int</sub> = 0.0319, R <sub>sigma</sub> = 0.0702]                   |
| Data/restraints/parameters                  | 5979/0/321                                                                      |
| Goodness-of-fit on F <sup>2</sup>           | 1.321                                                                           |
| Final R indexes [I ≥ 2σ (I)]                | R <sub>1</sub> = 0.1213, wR <sub>2</sub> = 0.3805                               |
| Final R indexes [all data]                  | R <sub>1</sub> = 0.1863, wR <sub>2</sub> = 0.4227                               |
| Largest diff. peak/hole / e Å <sup>-3</sup> | 1.77/-0.58                                                                      |

**Table S2.** Fractional Atomic Coordinates ( $\times 10^4$ ) and Equivalent Isotropic Displacement Parameters ( $\text{\AA}^2 \times 10^3$ ) for **1a**.  $U_{\text{eq}}$  is defined as 1/3 of the trace of the orthogonalised  $U_{ij}$  tensor.

| Atom | <i>x</i>  | <i>y</i>   | <i>z</i>    | $U(\text{eq})$ |
|------|-----------|------------|-------------|----------------|
| S2   | 7244(2)   | 1749.5(15) | 7713.9(10)  | 63.3(6)        |
| S1   | 5565(3)   | -1696(2)   | 10347.0(14) | 100.4(9)       |
| Cl1  | 7883(5)   | -2727(2)   | 11723.1(14) | 126.2(11)      |
| S3   | -1866(5)  | 9465(3)    | 4704.5(17)  | 143.5(14)      |
| F2   | 4745(5)   | 3942(4)    | 3563(2)     | 83.4(13)       |
| O1   | 4038(6)   | 3150(4)    | 4860(3)     | 65.2(12)       |
| F1   | 2605(6)   | 3011(4)    | 3782(3)     | 87.2(14)       |
| O2   | 2014(6)   | 4968(4)    | 4115(3)     | 64.1(12)       |
| C24  | -2166(16) | 9329(9)    | 3166(10)    | 57(2)          |
| C18  | 3894(7)   | 3777(5)    | 5476(4)     | 50.1(14)       |
| C20  | 1882(7)   | 5535(5)    | 4747(4)     | 51.5(15)       |
| C12  | 7516(8)   | -57(6)     | 6968(4)     | 57.3(16)       |
| C7   | 9344(8)   | -1903(6)   | 7883(4)     | 55.8(16)       |
| C11  | 8438(7)   | -589(5)    | 7684(4)     | 51.5(15)       |
| C17  | 4845(8)   | 3123(6)    | 6189(4)     | 54.4(15)       |
| C21  | 697(8)    | 6775(6)    | 4697(4)     | 57.2(16)       |
| C19  | 2847(8)   | 4971(6)    | 5430(4)     | 54.9(15)       |
| C23  | -1319(8)  | 8626(5)    | 3957(4)     | 57.2(16)       |
| C22  | -116(8)   | 7379(6)    | 4050(4)     | 59.4(16)       |
| C13  | 6772(8)   | 1165(6)    | 6901(4)     | 55.0(15)       |
| C14  | 8417(9)   | 307(6)     | 8149(4)     | 61.4(17)       |
| C3   | 8157(9)   | -2381(6)   | 9315(4)     | 60.9(17)       |
| C16  | 5710(8)   | 1945(6)    | 6247(4)     | 56.2(15)       |
| C6   | 9241(8)   | -2662(6)   | 8573(4)     | 62.5(17)       |
| C8   | 10591(9)  | -2613(7)   | 7244(4)     | 70.9(19)       |
| C2   | 8827(10)  | -2780(6)   | 10104(4)    | 70.2(19)       |
| C4   | 6346(9)   | -1795(7)   | 9335(5)     | 76(2)          |
| C1   | 7587(12)  | -2457(7)   | 10698(5)    | 81(2)          |
| C15  | 9320(11)  | 187(8)     | 8921(5)     | 82(2)          |
| C5   | 5094(9)   | -1313(8)   | 8664(5)     | 86(2)          |
| C25  | -3329(10) | 10515(8)   | 3426(6)     | 89(3)          |
| C10  | 10436(11) | -3942(7)   | 8515(5)     | 84(2)          |
| B1   | 3373(11)  | 3758(7)    | 4056(5)     | 66(2)          |
| C9   | 11078(13) | -3920(8)   | 7626(5)     | 106(3)         |
| C26  | -3185(15) | 10691(8)   | 4142(6)     | 114(4)         |



**Table S3.** Anisotropic Displacement Parameters ( $\text{\AA}^2 \times 10^3$ ) for **1a**. The Anisotropic displacement factor exponent takes the form:  $-2\pi^2[h^2a^*2U_{11}+2hka^*b^*U_{12}+\dots]$ .

| Atom | $U_{11}$  | $U_{22}$ | $U_{33}$ | $U_{23}$  | $U_{13}$  | $U_{12}$  |
|------|-----------|----------|----------|-----------|-----------|-----------|
| S2   | 77.8(12)  | 56.7(11) | 51.5(11) | -7.0(8)   | -3.3(8)   | -14.8(8)  |
| S1   | 108.3(17) | 85.5(15) | 72.2(15) | 5.1(12)   | 29.5(12)  | 3.4(12)   |
| Cl1  | 215(3)    | 95.5(17) | 56.5(14) | -9.7(13)  | 5.1(16)   | -33.7(18) |
| S3   | 200(3)    | 93.3(19) | 83.5(19) | -21.6(15) | -13.2(19) | 42.1(19)  |
| F2   | 73(3)     | 94(3)    | 67(3)    | -9(2)     | 8(2)      | -6(2)     |
| O1   | 76(3)     | 50(3)    | 54(3)    | -8(2)     | -15(2)    | 9(2)      |
| F1   | 99(3)     | 65(3)    | 101(4)   | -26(2)    | -37(3)    | -12(2)    |
| O2   | 72(3)     | 51(3)    | 58(3)    | -9(2)     | -17(2)    | 2.7(19)   |
| C24  | 50(3)     | 37(4)    | 80(5)    | -16(4)    | -10(3)    | -2(3)     |
| C18  | 45(3)     | 48(3)    | 53(4)    | -6(3)     | 1(2)      | -9(2)     |
| C20  | 47(3)     | 47(3)    | 53(4)    | -9(3)     | 6(3)      | -6(2)     |
| C12  | 73(4)     | 59(4)    | 37(3)    | -7(3)     | 0(3)      | -18(3)    |
| C7   | 52(3)     | 64(4)    | 51(4)    | -7(3)     | -5(3)     | -16(3)    |
| C11  | 52(3)     | 50(4)    | 51(4)    | -4(3)     | 2(3)      | -17(3)    |
| C17  | 57(3)     | 63(4)    | 44(3)    | -14(3)    | 3(3)      | -17(3)    |
| C21  | 54(3)     | 52(4)    | 60(4)    | -9(3)     | -1(3)     | -7(3)     |
| C19  | 59(4)     | 51(4)    | 53(4)    | -15(3)    | 2(3)      | -11(3)    |
| C23  | 51(3)     | 47(3)    | 68(4)    | -6(3)     | 5(3)      | -11(3)    |
| C22  | 58(4)     | 52(4)    | 64(4)    | -8(3)     | 2(3)      | -12(3)    |
| C13  | 62(4)     | 57(4)    | 39(3)    | 0(3)      | 6(3)      | -14(3)    |
| C14  | 72(4)     | 66(4)    | 45(4)    | 0(3)      | -6(3)     | -22(3)    |
| C3   | 74(4)     | 50(3)    | 47(4)    | 2(3)      | 2(3)      | -8(3)     |
| C16  | 58(4)     | 58(4)    | 48(4)    | -3(3)     | -2(3)     | -13(3)    |
| C6   | 60(4)     | 62(4)    | 56(4)    | -2(3)     | 1(3)      | -8(3)     |

**Table S4.** Bond Lengths for **1a**.

| <b>Atom</b> | <b>Atom</b> | <b>Length/Å</b> | <b>Atom</b> | <b>Atom</b> | <b>Length/Å</b> |
|-------------|-------------|-----------------|-------------|-------------|-----------------|
| S2          | C13         | 1.729(7)        | C12         | C13         | 1.336(9)        |
| S2          | C14         | 1.715(7)        | C7          | C11         | 1.458(8)        |
| S1          | C4          | 1.747(7)        | C7          | C6          | 1.337(9)        |
| S1          | C1          | 1.698(9)        | C7          | C8          | 1.536(9)        |
| C11         | C1          | 1.714(8)        | C11         | C14         | 1.381(9)        |
| S3          | C23         | 1.642(7)        | C17         | C16         | 1.309(9)        |
| S3          | C26         | 1.683(10)       | C21         | C22         | 1.300(9)        |
| F2          | B1          | 1.352(9)        | C23         | C22         | 1.453(9)        |
| O1          | C18         | 1.324(7)        | C13         | C16         | 1.456(9)        |
| O1          | B1          | 1.477(9)        | C14         | C15         | 1.508(10)       |
| F1          | B1          | 1.354(9)        | C3          | C6          | 1.459(9)        |
| O2          | C20         | 1.306(7)        | C3          | C2          | 1.424(9)        |
| O2          | B1          | 1.488(8)        | C3          | C4          | 1.397(10)       |
| C24         | C23         | 1.534(18)       | C6          | C10         | 1.499(9)        |
| C24         | C25         | 1.497(14)       | C8          | C9          | 1.480(10)       |
| C18         | C17         | 1.449(9)        | C2          | C1          | 1.340(10)       |
| C18         | C19         | 1.365(8)        | C4          | C5          | 1.501(11)       |
| C20         | C21         | 1.442(8)        | C25         | C26         | 1.266(12)       |
| C20         | C19         | 1.395(9)        | C10         | C9          | 1.516(10)       |
| C12         | C11         | 1.418(8)        |             |             |                 |

Table S5. Bond Angles for 1a.

| Atom | Atom | Atom | Angle/°   | Atom | Atom | Atom | Angle/°  |
|------|------|------|-----------|------|------|------|----------|
| C14  | S2   | C13  | 91.9(3)   | C11  | C14  | S2   | 111.4(5) |
| C1   | S1   | C4   | 92.3(4)   | C11  | C14  | C15  | 129.6(6) |
| C23  | S3   | C26  | 94.0(4)   | C15  | C14  | S2   | 118.8(5) |
| C18  | O1   | B1   | 122.1(5)  | C2   | C3   | C6   | 122.6(6) |
| C20  | O2   | B1   | 120.6(5)  | C4   | C3   | C6   | 124.1(7) |
| C25  | C24  | C23  | 102.6(11) | C4   | C3   | C2   | 113.1(6) |
| O1   | C18  | C17  | 116.9(5)  | C17  | C16  | C13  | 128.7(7) |
| O1   | C18  | C19  | 120.0(6)  | C7   | C6   | C3   | 128.3(6) |
| C19  | C18  | C17  | 123.1(6)  | C7   | C6   | C10  | 111.1(6) |
| O2   | C20  | C21  | 116.4(6)  | C3   | C6   | C10  | 120.5(6) |
| O2   | C20  | C19  | 121.6(5)  | C9   | C8   | C7   | 104.6(6) |
| C19  | C20  | C21  | 122.0(6)  | C1   | C2   | C3   | 112.4(7) |
| C13  | C12  | C11  | 114.8(6)  | C3   | C4   | S1   | 108.9(6) |
| C11  | C7   | C8   | 120.3(6)  | C3   | C4   | C5   | 131.1(7) |
| C6   | C7   | C11  | 129.2(6)  | C5   | C4   | S1   | 120.0(5) |
| C6   | C7   | C8   | 110.5(6)  | S1   | C1   | Cl1  | 120.2(5) |
| C12  | C11  | C7   | 124.1(6)  | C2   | C1   | S1   | 113.3(6) |
| C14  | C11  | C12  | 111.0(5)  | C2   | C1   | Cl1  | 126.6(7) |
| C14  | C11  | C7   | 124.8(6)  | C26  | C25  | C24  | 116.5(9) |
| C16  | C17  | C18  | 121.8(6)  | C6   | C10  | C9   | 104.7(6) |
| C22  | C21  | C20  | 124.4(6)  | F2   | B1   | O1   | 108.1(6) |
| C18  | C19  | C20  | 120.7(6)  | F2   | B1   | F1   | 112.8(7) |
| C24  | C23  | S3   | 112.2(5)  | F2   | B1   | O2   | 109.2(6) |
| C22  | C23  | S3   | 122.5(6)  | O1   | B1   | O2   | 111.5(6) |
| C22  | C23  | C24  | 125.3(7)  | F1   | B1   | O1   | 107.4(6) |
| C21  | C22  | C23  | 127.2(7)  | F1   | B1   | O2   | 107.8(6) |
| C12  | C13  | S2   | 110.7(5)  | C8   | C9   | C10  | 107.5(6) |
| C12  | C13  | C16  | 126.7(6)  | C25  | C26  | S3   | 114.2(7) |
| C16  | C13  | S2   | 122.6(5)  |      |      |      |          |

**Table S6.** Hydrogen Atom Coordinates ( $\text{\AA}\times 10^4$ ) and Isotropic Displacement Parameters ( $\text{\AA}^2\times 10^3$ ) for **1a**.

| Atom | x          | y         | z         | U(eq) |
|------|------------|-----------|-----------|-------|
| H24  | -2210(180) | 9290(110) | 3140(100) | 68    |
| H12  | 7434       | -523      | 6576      | 69    |
| H17  | 4841       | 3552      | 6616      | 65    |
| H21  | 502        | 7168      | 5157      | 69    |
| H19  | 2775       | 5415      | 5858      | 66    |
| H22  | 95         | 6968      | 3597      | 71    |
| H16  | 5636       | 1553      | 5812      | 67    |
| H8A  | 10004      | -2509     | 6745      | 85    |
| H8B  | 11624      | -2329     | 7121      | 85    |
| H2   | 9995       | -3215     | 10197     | 84    |
| H15A | 9492       | 963       | 8970      | 123   |
| H15B | 10439      | -436      | 8906      | 123   |
| H15C | 8603       | -44       | 9381      | 123   |
| H5A  | 3991       | -1463     | 8847      | 129   |
| H5B  | 5578       | -1728     | 8200      | 129   |
| H5C  | 4910       | -441      | 8516      | 129   |
| H25  | -4117      | 11094     | 3079      | 107   |
| H10A | 9804       | -4549     | 8674      | 101   |
| H10B | 11415      | -4137     | 8861      | 101   |
| H9A  | 12343      | -4286     | 7580      | 128   |
| H9B  | 10533      | -4388     | 7359      | 128   |
| H26  | -3757      | 11432     | 4340      | 137   |

#### 4. Photochromism and fluorescent switching behaviors of **1a-1d**

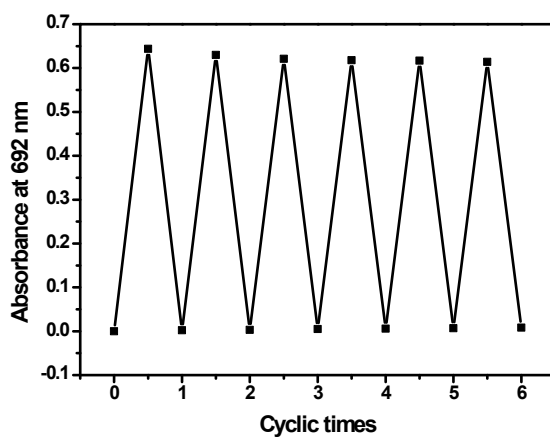

**Figure S2.** Fatigue resistance of **1a** on alternating irradiation with green light at 520 - 530 nm and red light at 650 - 660 nm over six cycles in toluene ( $2.0 \times 10^{-5}$  mol/L).

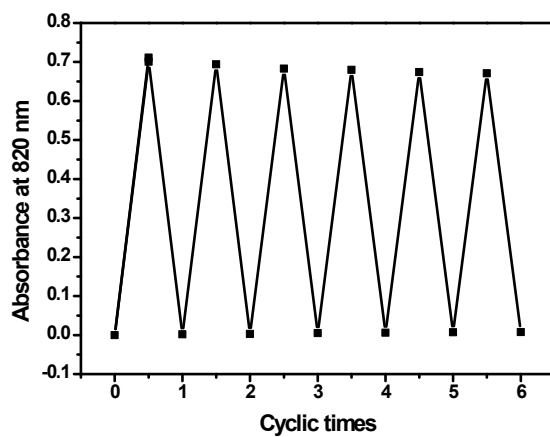

**Figure S3.** Fatigue resistance of **1b** on alternating irradiation with green light at 520 - 530 nm and near-infrared light at 800 - 810 nm over six cycles in toluene ( $2.0 \times 10^{-5}$  mol/L).

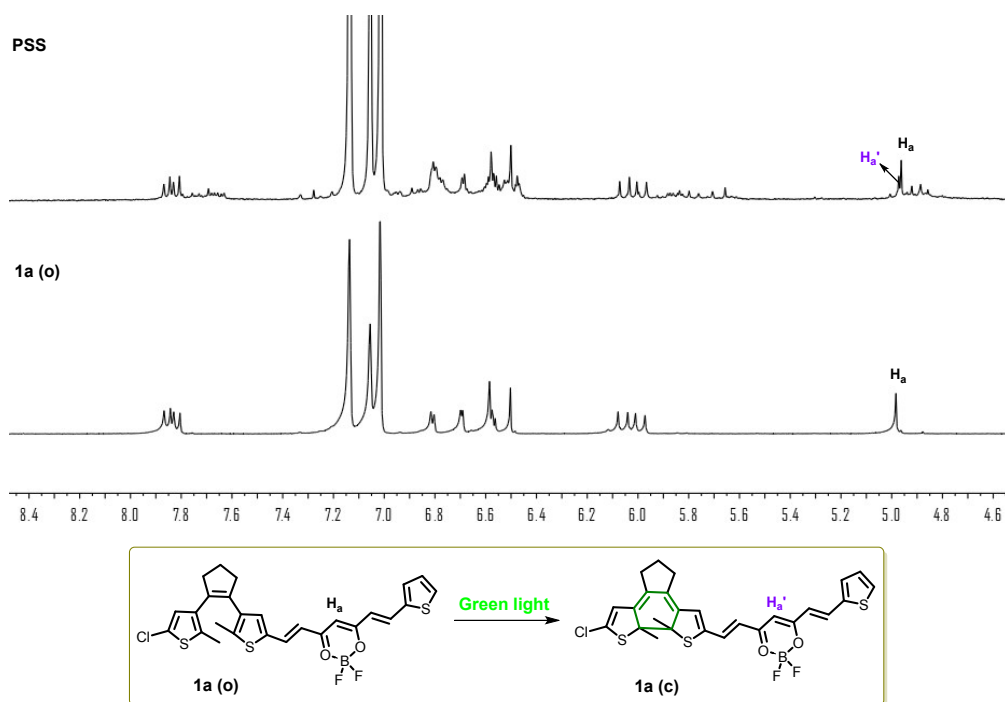

**Figure S4.** Partial  $^1\text{H}$  NMR spectral changes of **1a** upon irradiation with green light at 520 - 530 nm in toluene- $d_8$  at room temperature.

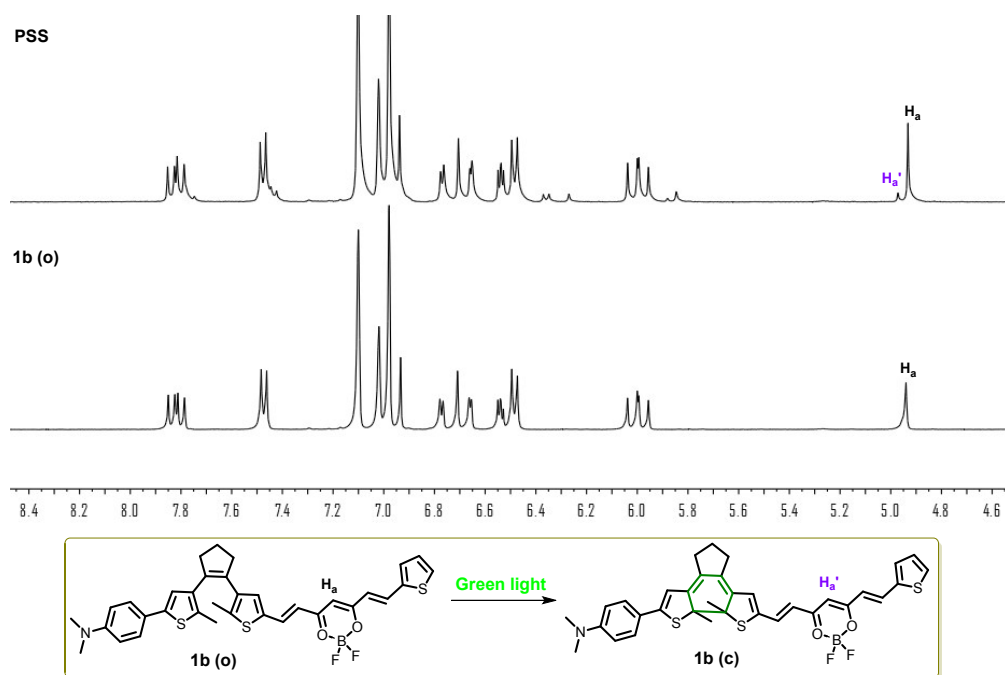

**Figure S5.** Partial  $^1\text{H}$  NMR spectral changes of **1b** upon irradiation with green light at 520 - 530 nm in toluene- $d_8$  at room temperature.

**Table S7.** The conversion ratio of **1a-1d** at the photostationary state (PSS).

| Compounds | Conversion ratio (%) | Compounds | Conversion ratio (%) |
|-----------|----------------------|-----------|----------------------|
| <b>1a</b> | 42                   | <b>1c</b> | 51                   |
| <b>1b</b> | 19                   | <b>1d</b> | 34                   |

**Table S8.** The fluorescence data of **1a-1d** in toluene ( $2.0 \times 10^{-5}$  mol/L).

| Solvents  | $\lambda_{\text{em}}^a$ (nm) | $\Phi_f^b$ | Rate of quenching (%) <sup>c</sup> |
|-----------|------------------------------|------------|------------------------------------|
| <b>1a</b> | 550                          | 0.49       | 75                                 |
| <b>1b</b> | 556                          | 0.17       | 84                                 |
| <b>1c</b> | 552                          | 0.37       | 65                                 |
| <b>1d</b> | 582                          | 0.14       | 82                                 |

<sup>a</sup> Fluorescence emission maxima; <sup>b</sup> Fluorescence quantum yield determined by a standard method with rhodamine 6G in water ( $\Phi_f = 0.75$ ,  $\lambda_{\text{ex}} = 488$  nm) as reference; <sup>c</sup> Percentage of fluorescence intensity quenching upon irradiation with green light (520 - 530 nm).

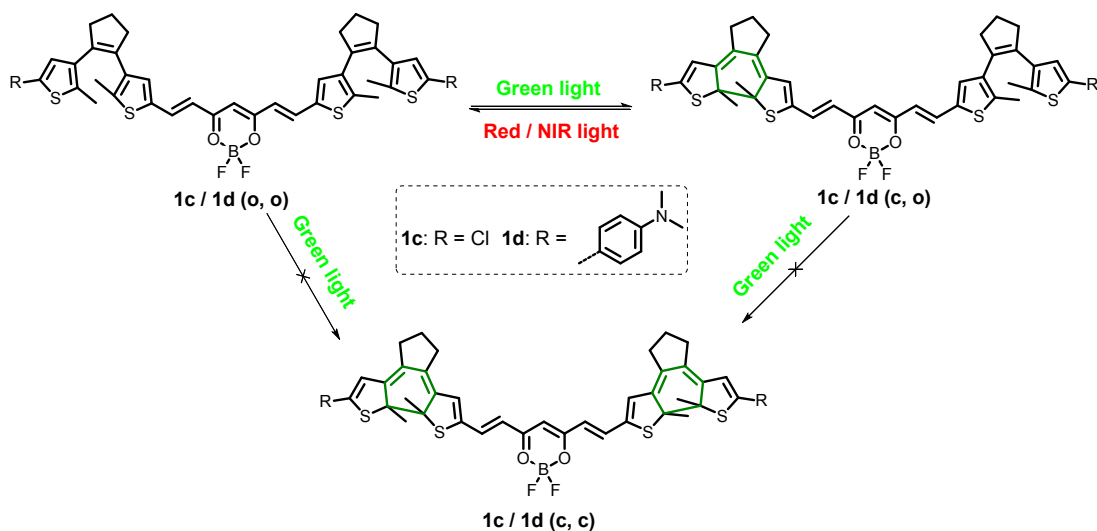

**Scheme S2.** Photochromic reaction of bis-dithienylethenes **1c** and **1d**.

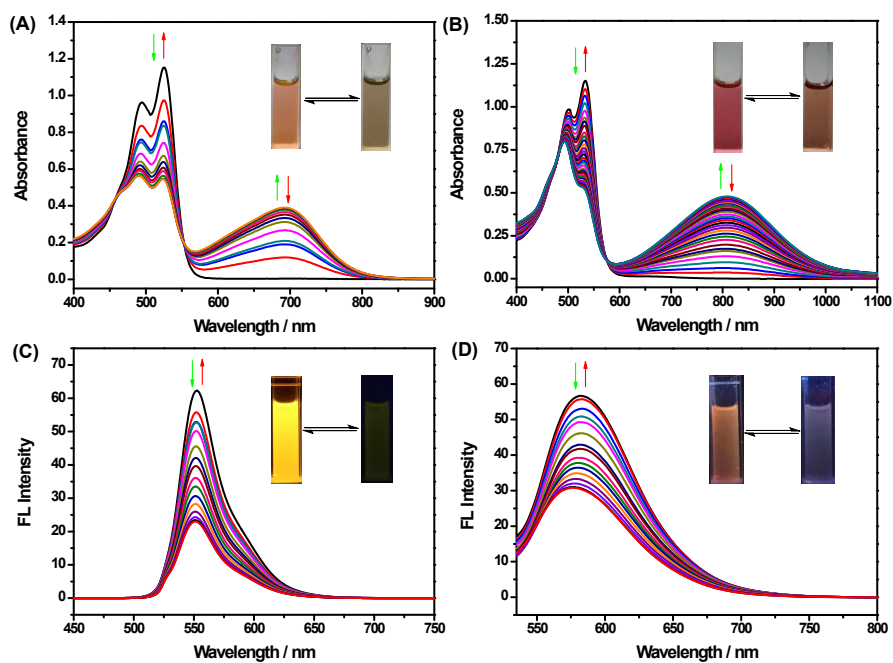

**Figure S6.** The absorption and emission spectra changes of **1c** and **1d** in toluene ( $2.0 \times 10^{-5}$  mol/L) upon alternating irradiation with green light at 520 - 530 nm and red light at 650 - 660 nm (or near-infrared light at 800 - 810 nm). (Inset) Corresponding color and fluorescence changes of **1c** and **1d** upon photoirradiation, (A) absorption spectra changes for **1c** (0 - 55 s); (B) absorption spectra changes for **1d** (0 - 1200 s); (C) emission spectra changes for **1c**; (D) emission spectra changes for **1d**.

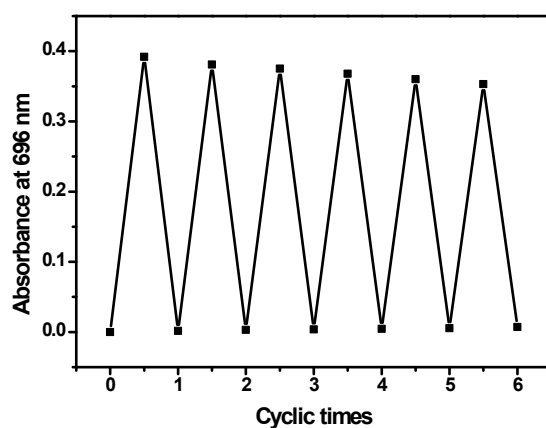

**Figure S7.** Fatigue resistance of **1c** on alternating irradiation with green light at 520 - 530 nm and red light at 650 - 660 nm over six cycles in toluene ( $2.0 \times 10^{-5}$  mol/L).

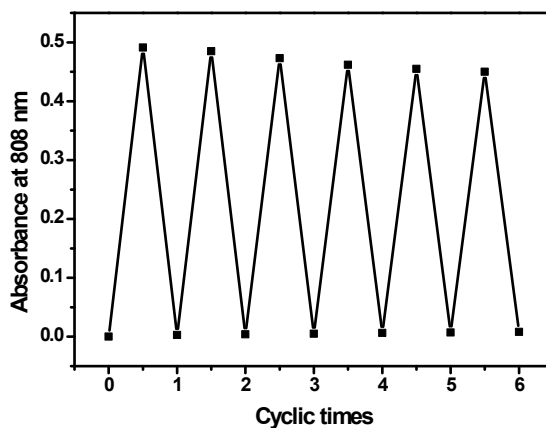

**Figure S8.** Fatigue resistance of **1d** on alternating irradiation with green light at 520 - 530 nm and near-infrared light at 800 - 810 nm over six cycles in toluene ( $2.0 \times 10^{-5}$  mol/L).

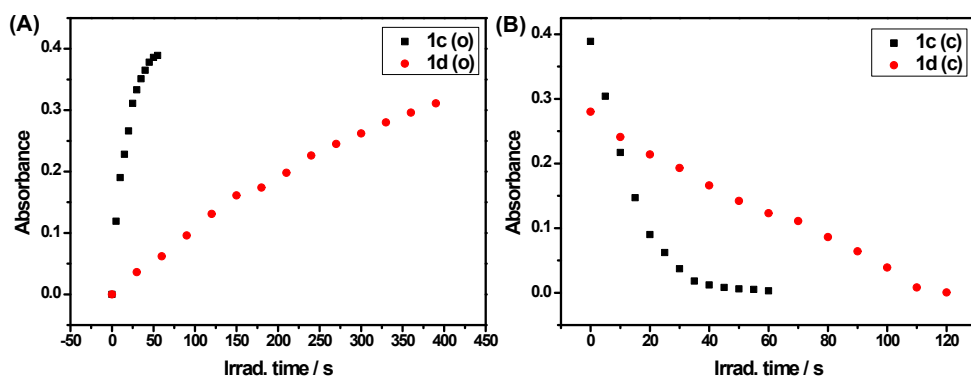

**Figure S9.** Optical response rates of **1c** and **1d** upon irradiation with green light (A) and red / NIR light (B) in toluene monitored at the maximum absorption wavelength for ring-closed isomers.



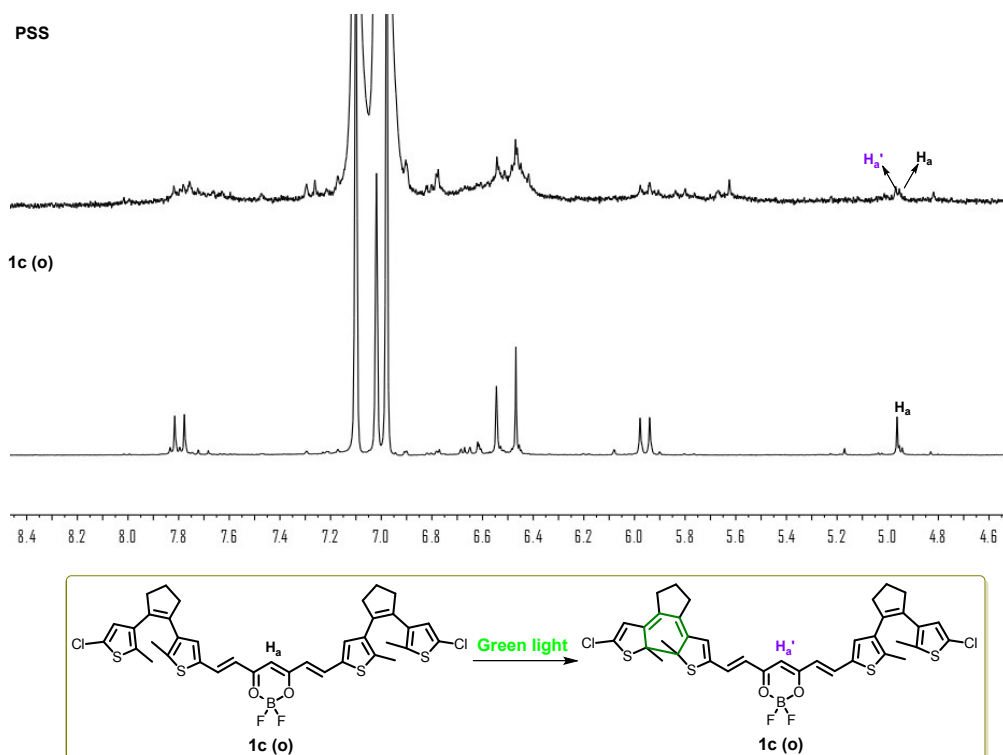

**Figure S10.** Partial  $^1\text{H}$  NMR spectral changes of **1c** upon irradiation with green light at 520 - 530 nm in  $\text{toluene-}d_8$  at room temperature (Note: solubility of **1c** becomes worse after irradiation with green light).

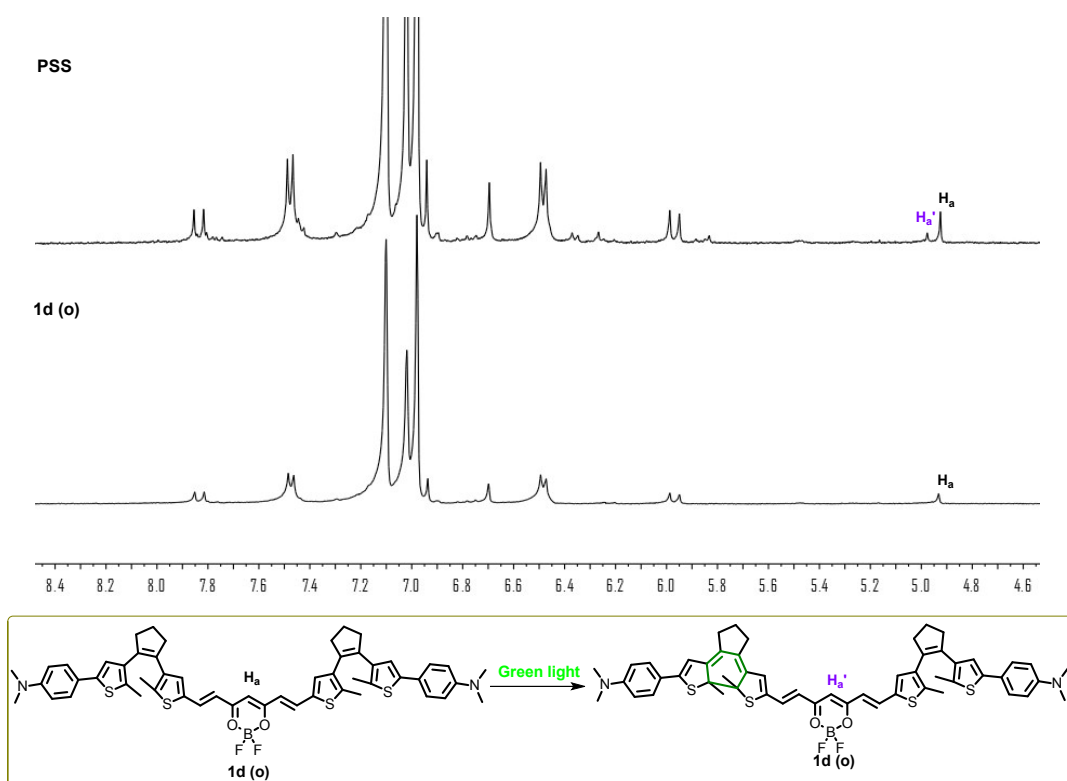

**Figure S11.** Partial  $^1\text{H}$  NMR spectral changes of **1d** upon irradiation with green light at 520 - 530 nm in  $\text{toluene-}d_8$  at room temperature.

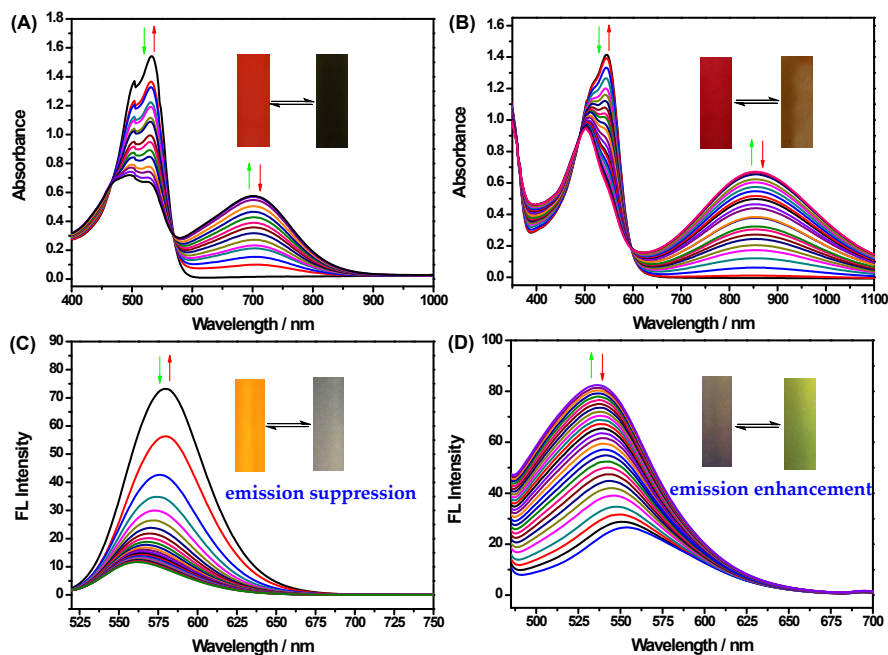

**Figure S12.** The absorption and emission spectra changes of **1c** and **1d** in the PMMA film upon alternating irradiation with green light at 520 - 530 nm and red light at 650 - 660 nm (or near-infrared light at 800 - 810 nm). (Inset) Corresponding color and fluorescence changes of **1c** and **1d** upon photoirradiation, (A) absorption spectra changes for **1c** (0 - 30 s); (B) absorption spectra changes for **1d** (0 - 57 s); (C) emission spectra changes for **1c**; (D) emission spectra changes for **1d**.

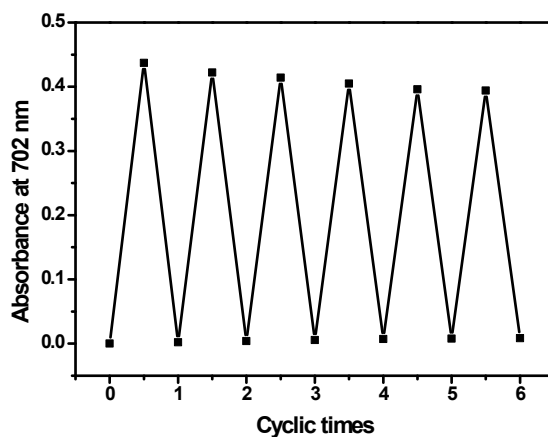

**Figure S13.** Fatigue resistance of **1a** on alternating irradiation with green light at 520 - 530 nm and red light at 650 - 660 nm over six cycles in the PMMA film.

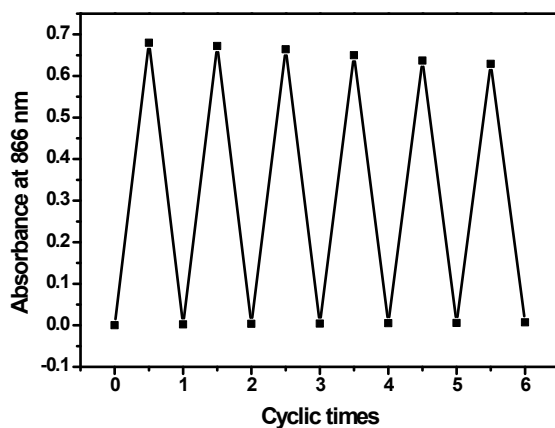

**Figure S14.** Fatigue resistance of **1b** on alternating irradiation with green light at 520 - 530 nm and near-infrared light at 800 - 810 nm over six cycles in the PMMA film.

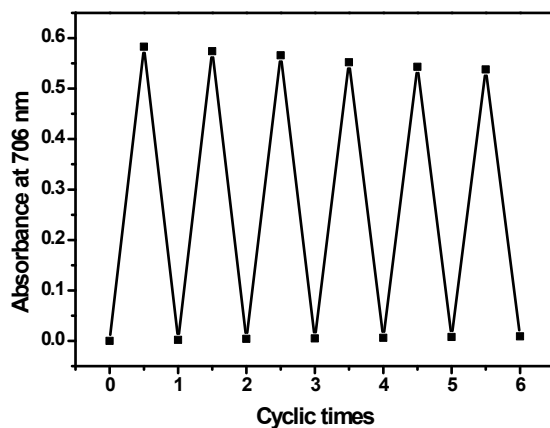

**Figure S15.** Fatigue resistance of **1c** on alternating irradiation with green light at 520 - 530 nm and red light at 650 - 660 nm over six cycles in the PMMA film.

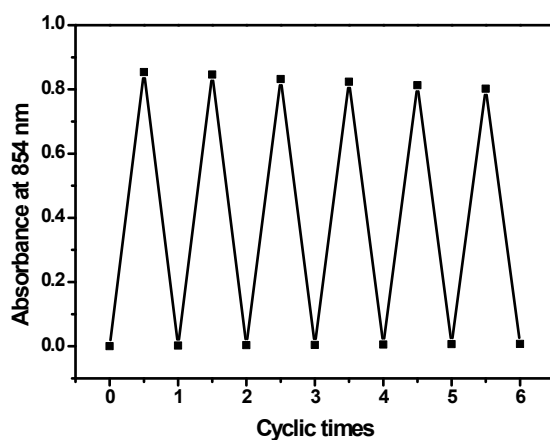

**Figure S16.** Fatigue resistance of **1d** on alternating irradiation with green light at 520 - 530 nm and near-infrared light at 800 - 810 nm over six cycles in the PMMA film.

## 5. DFT theoretical calculations of 1a-1d

The electron densities and ground-state geometries of **1a-1d** are calculated via density functional theory in Gaussian 09 B3LYP/6-31G\* level.<sup>4-6</sup>

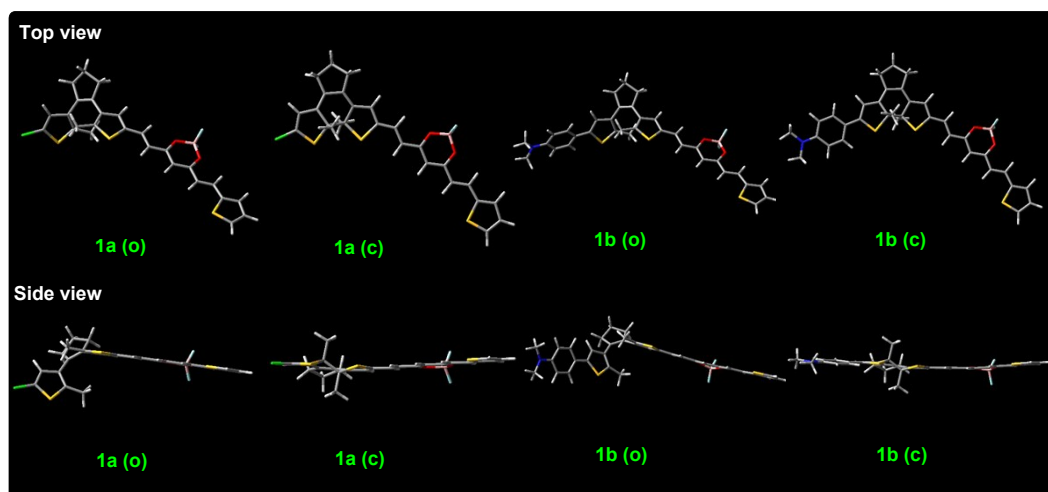

**Figure S17.** Optimized ground-state geometry of **1a** and **1b** based on DFT calculations at the B3LYP/6-31G\* level by using the Gaussian 09 program.

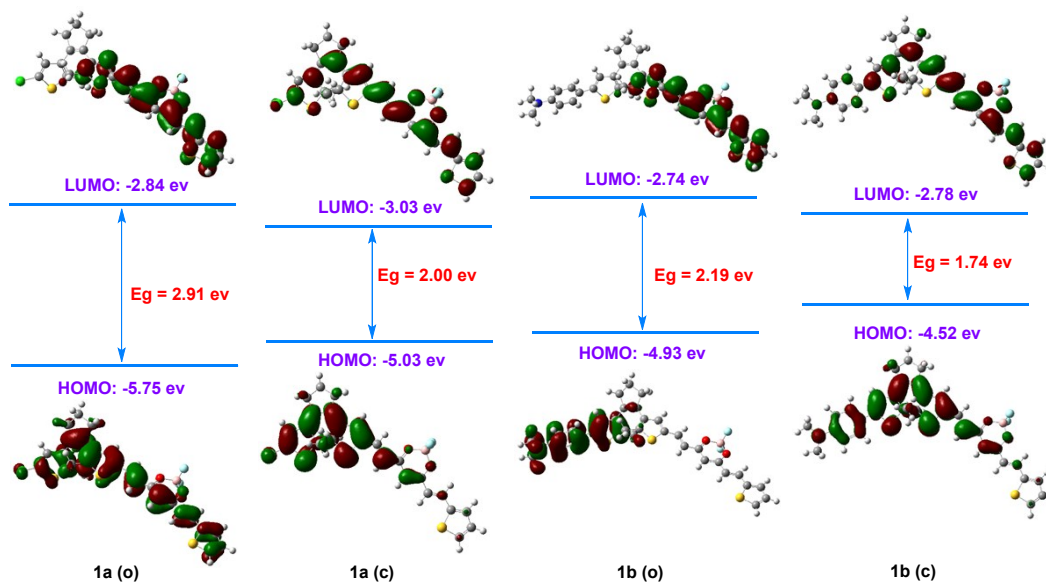

**Figure S18.** Frontier molecular orbital profiles of **1a** and **1b** based on DFT calculations at the B3LYP/6-31G\* level by using the Gaussian 09 program.

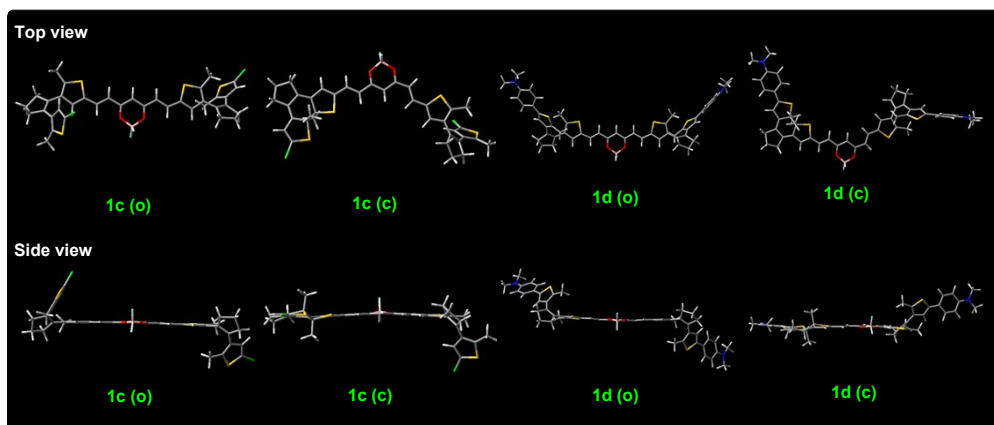

**Figure S19.** Optimized ground-state geometry of **1c** and **1d** based on DFT calculations at the B3LYP/6-31G\* level by using the Gaussian 09 program.

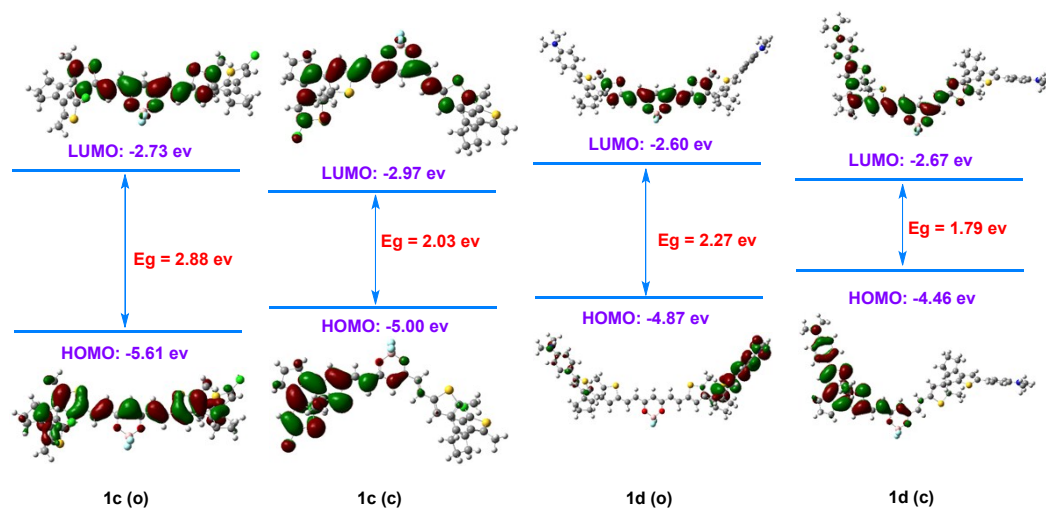

**Figure S20.** Frontier molecular orbital profiles of **1c** and **1d** based on DFT calculations at the B3LYP/6-31G\* level by using the Gaussian 09 program.

## 6. Confocal fluorescence microscope imaging of **1b**

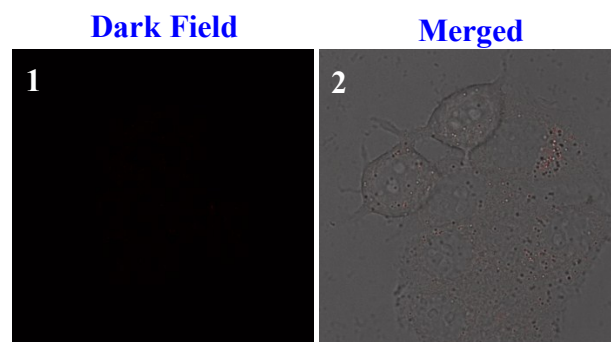

**Figure S21.** Fluorescence and bright-field images of cells are stained with **1b** (10  $\mu$ M) before irradiation with green light at 520 - 530 nm ( $\lambda_{\text{ex}}$  = 510 nm,  $\lambda_{\text{em}}$  = 530 - 750 nm). Fluoresce image (1); merged images of fluorescence and bright fields (2).

## 7. Appendix: NMR and Mass spectra

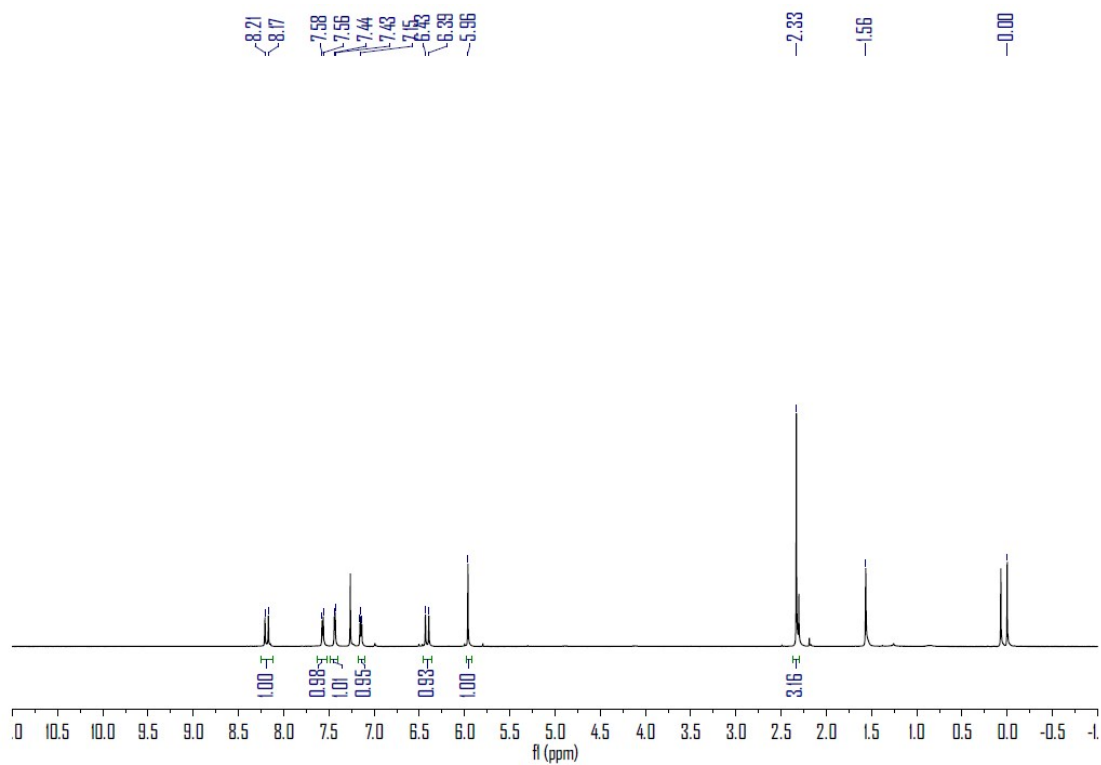

Figure S22. 400 MHz  $^1\text{H}$  NMR spectrum of **3** in  $\text{CDCl}_3$  at room temperature.

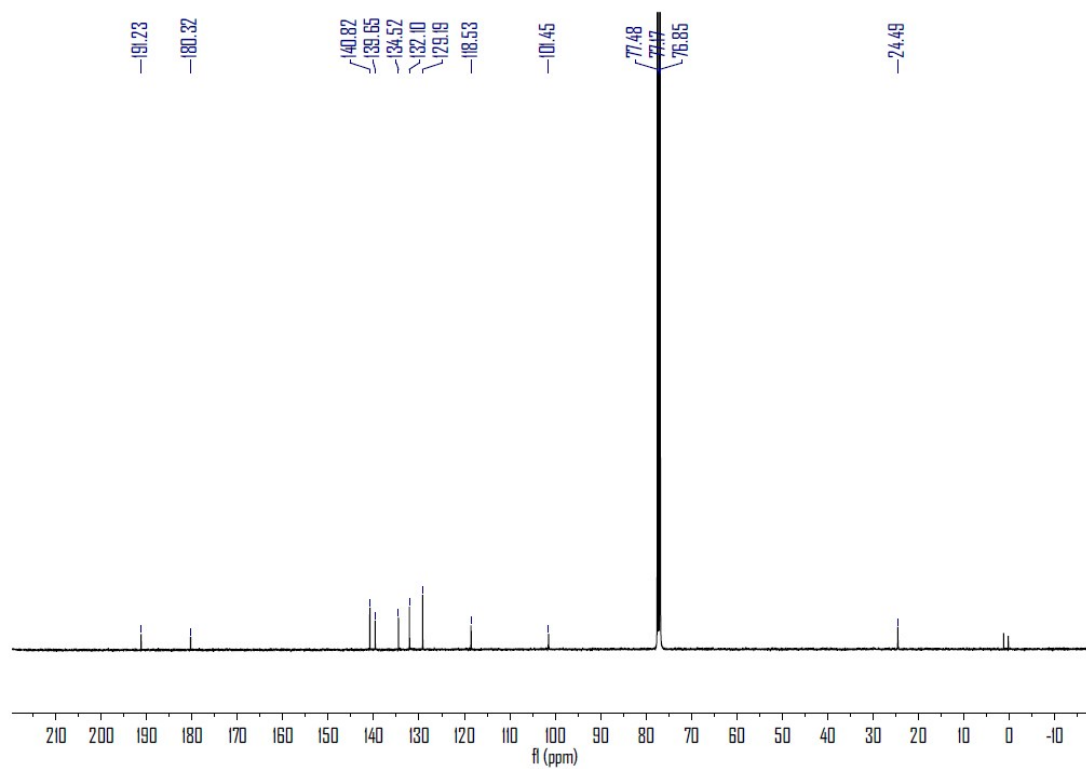

Figure S23. 100 MHz  $^{13}\text{C}$  NMR spectrum of **3** in  $\text{CDCl}_3$  at room temperature.

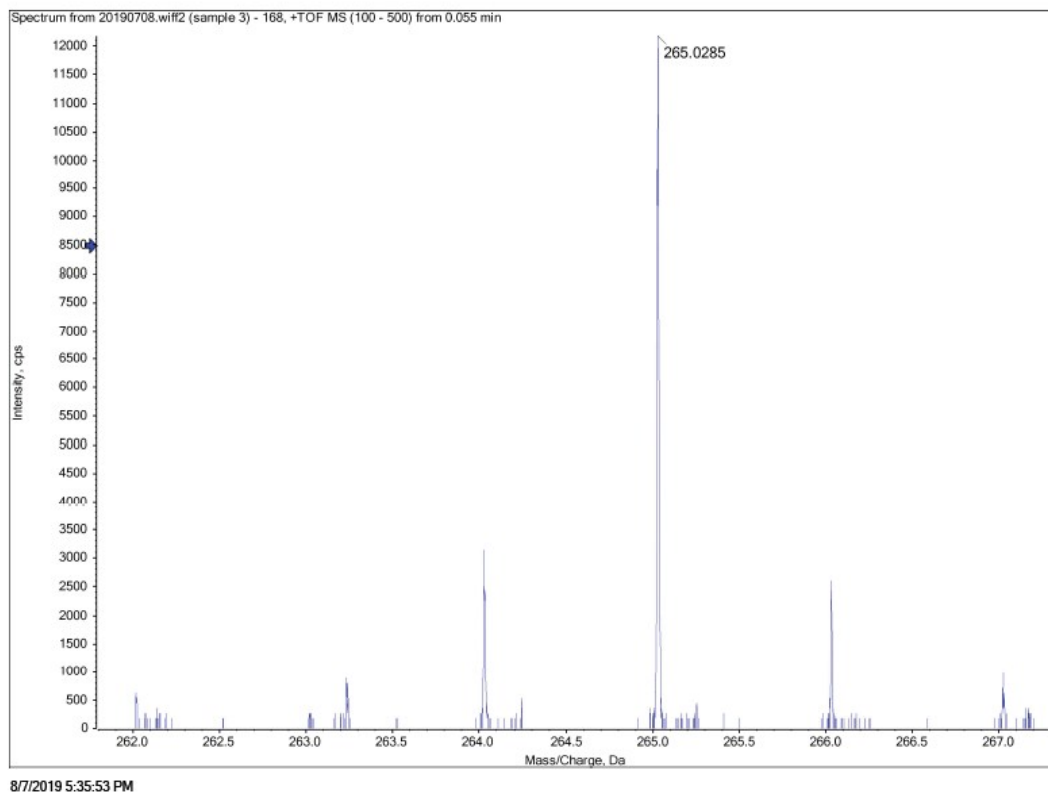

Figure S24. HRMS of **3**.

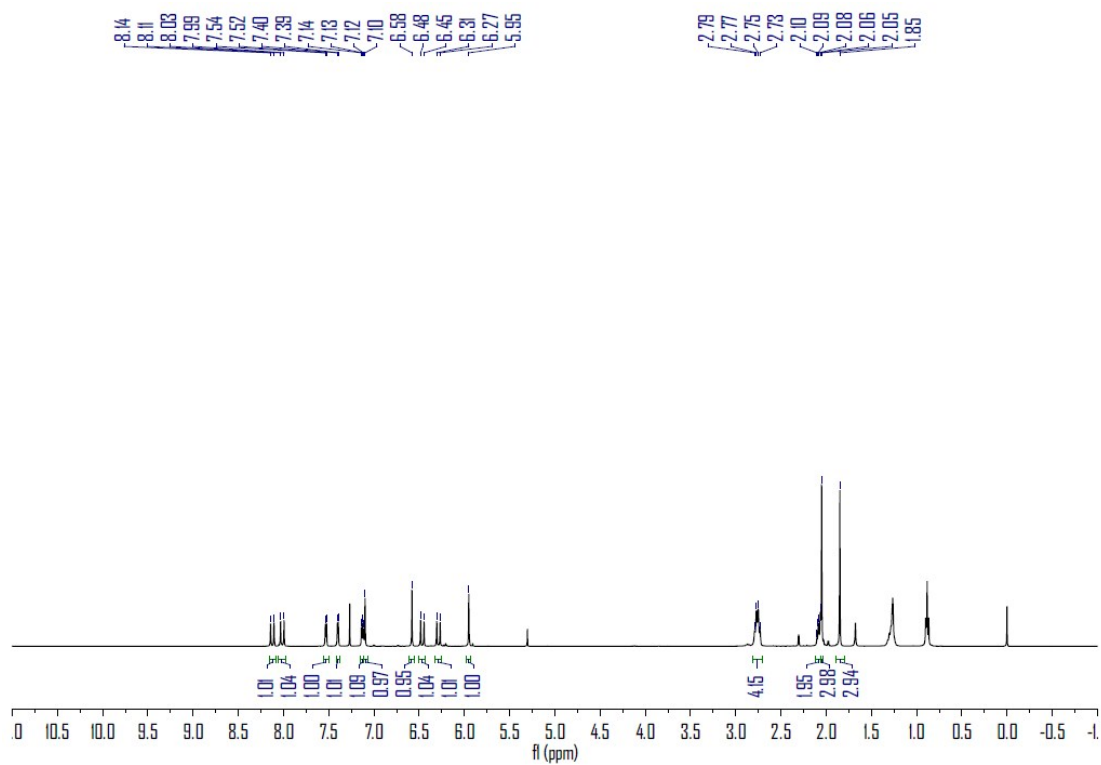

Figure S25. 400 MHz  $^1\text{H}$  NMR spectrum of **1a** in  $\text{CDCl}_3$  at room temperature.

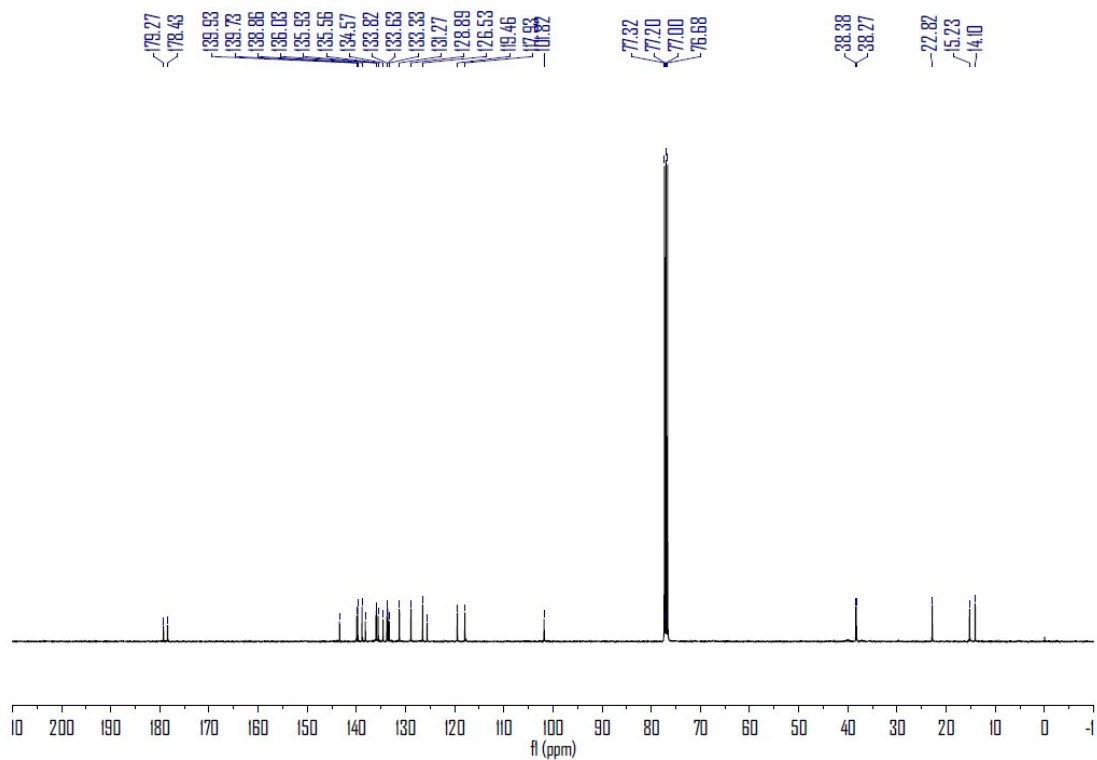

Figure S26. 100 MHz  $^{13}\text{C}$  NMR spectrum of **1a** in  $\text{CDCl}_3$  at room temperature.

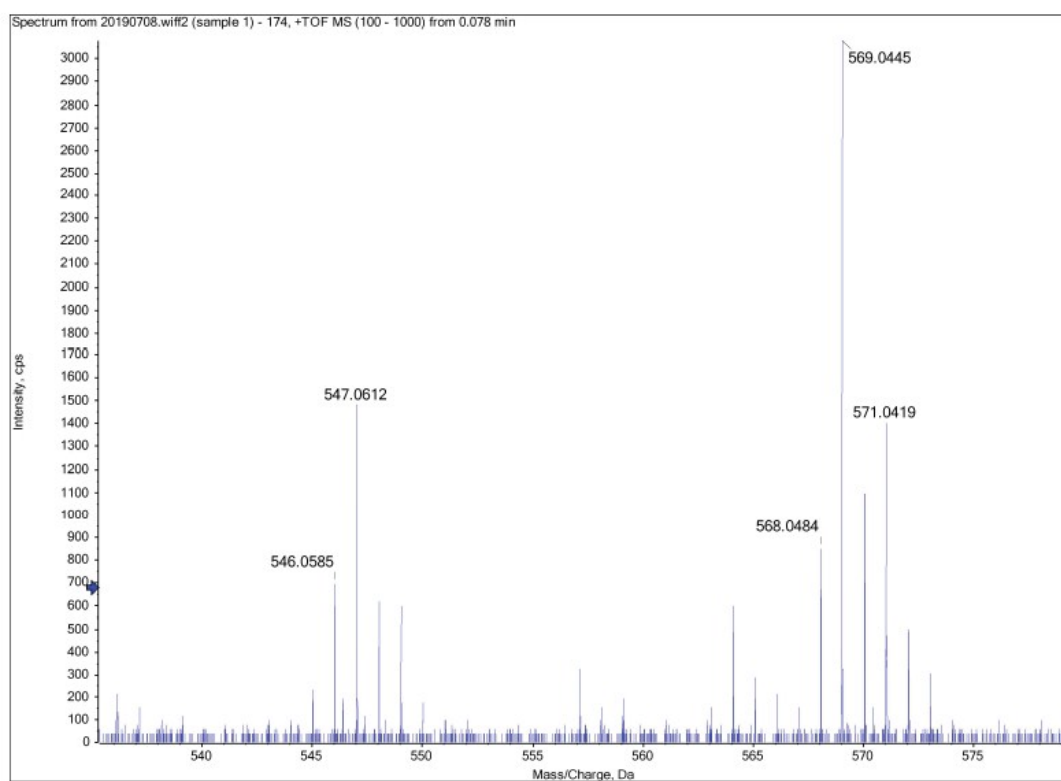

8/7/2019 4:05:41 PM

Figure S27. HRMS of **1a**.



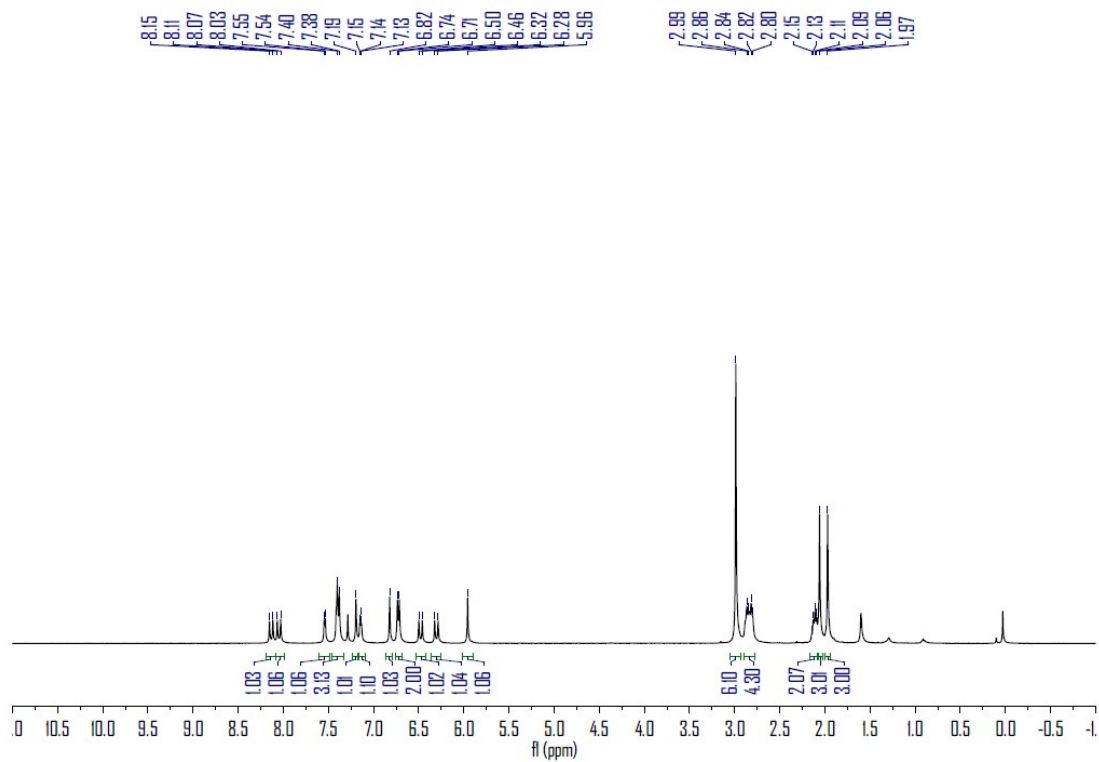

Figure S28. 400 MHz  $^1\text{H}$  NMR spectrum of **1b** in  $\text{CDCl}_3$  at room temperature.

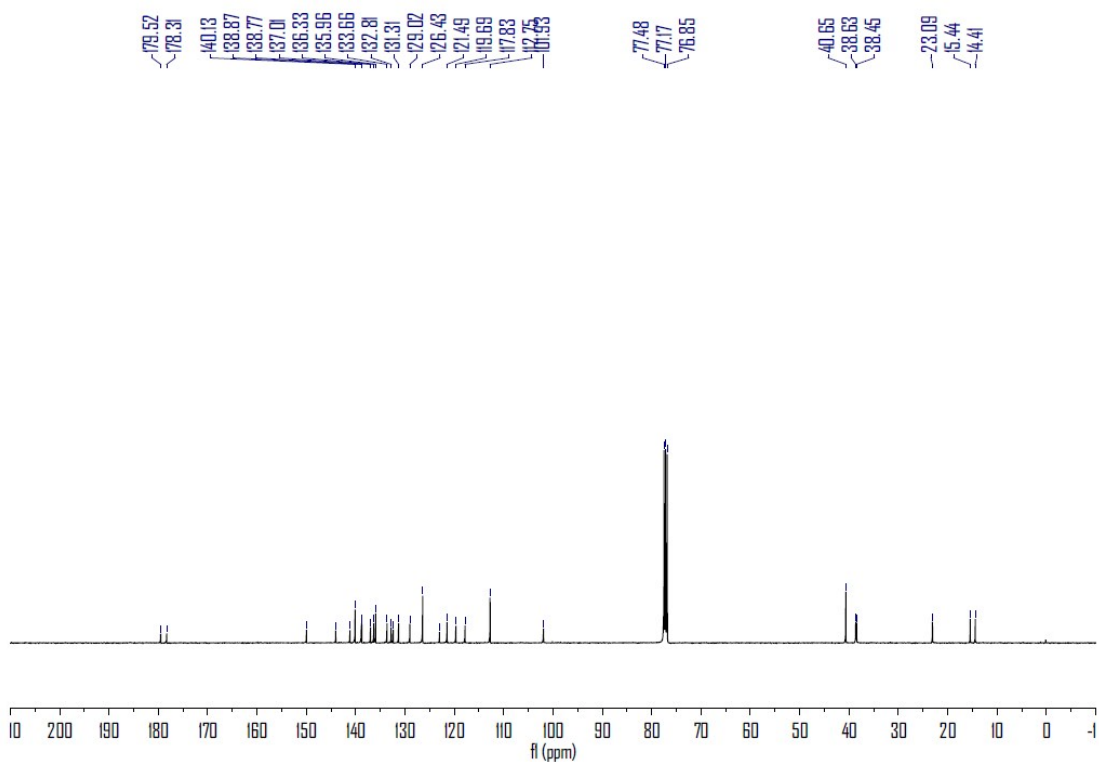

Figure S29. 100 MHz  $^{13}\text{C}$  NMR spectrum of **1b** in  $\text{CDCl}_3$  at room temperature.

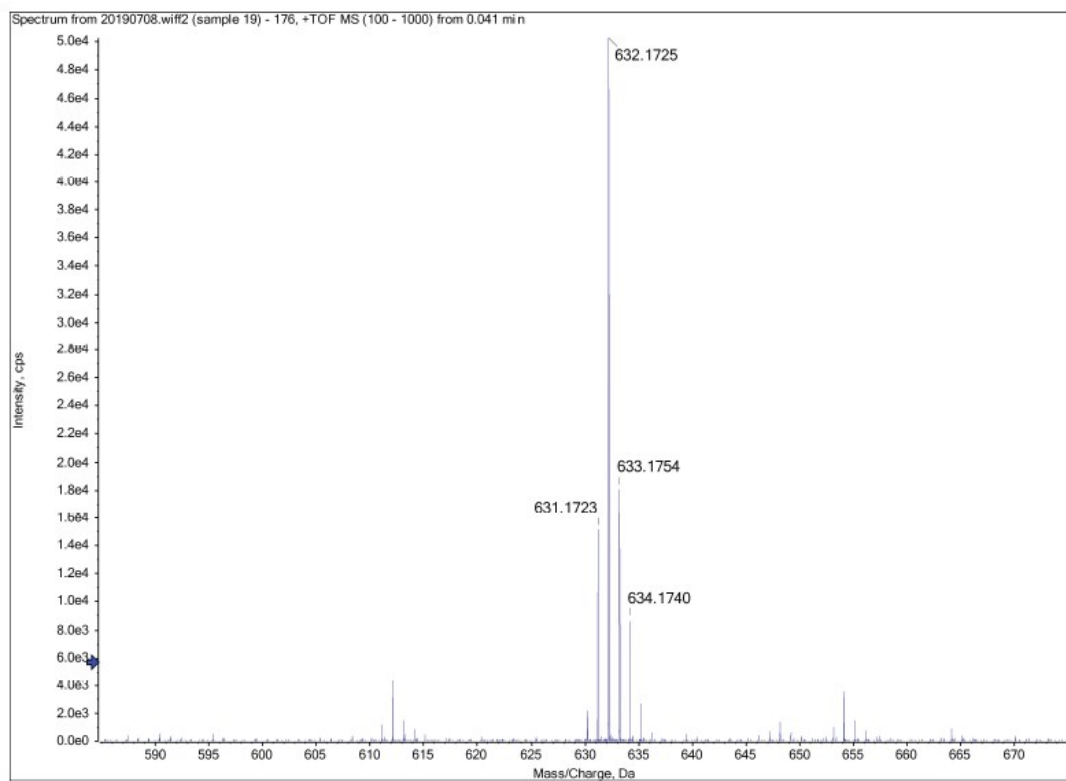

Figure S30. HRMS of 1b.

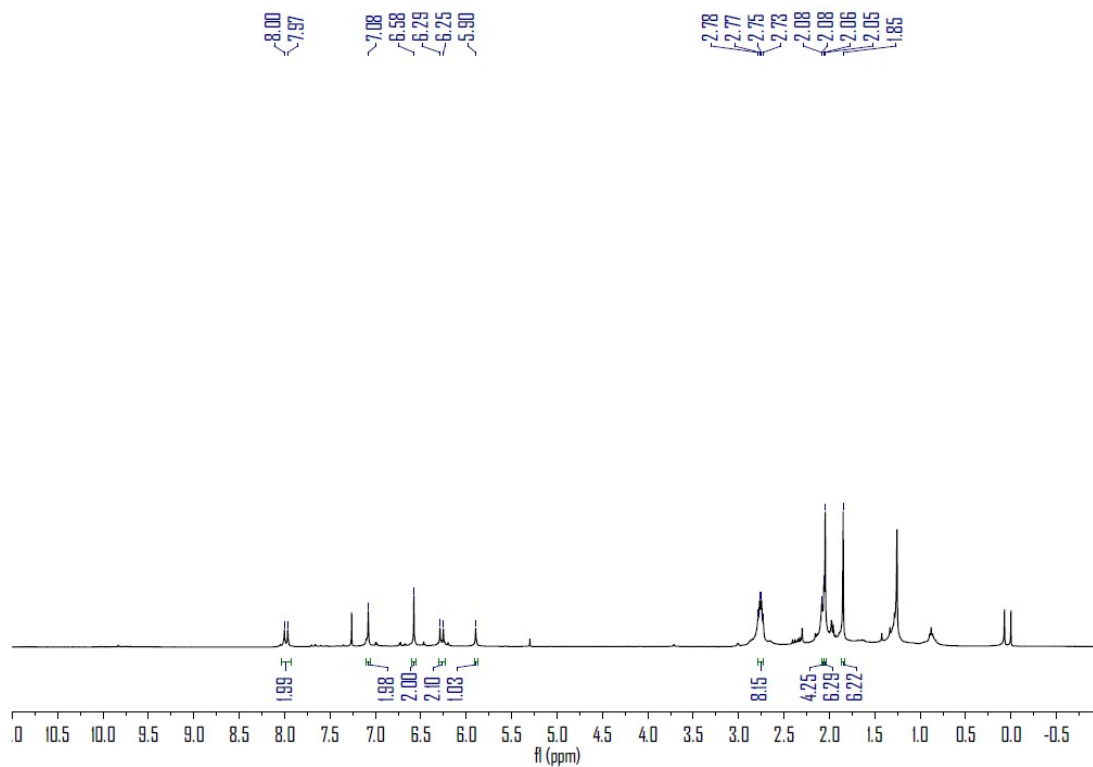

Figure S31. 400 MHz  $^1\text{H}$  NMR spectrum of 1c in  $\text{CDCl}_3$  at room temperature.

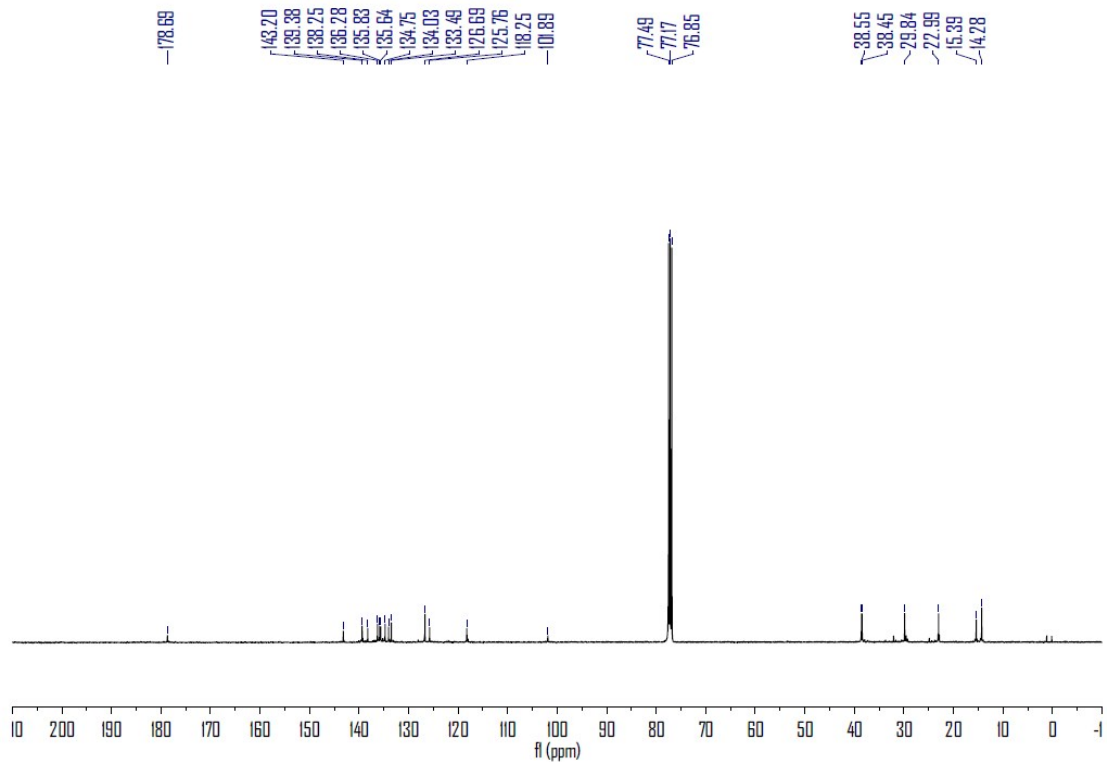

Figure S32. 100 MHz  $^{13}\text{C}$  NMR spectrum of **1c** in  $\text{CDCl}_3$  at room temperature.

Varian ProMALDI  
File: whj073\_MALDI.trans

Mode: Positive  
Scans: 1  
Date: 22-JUN-2018  
Time: 12:39:19  
Scale: 25.4691

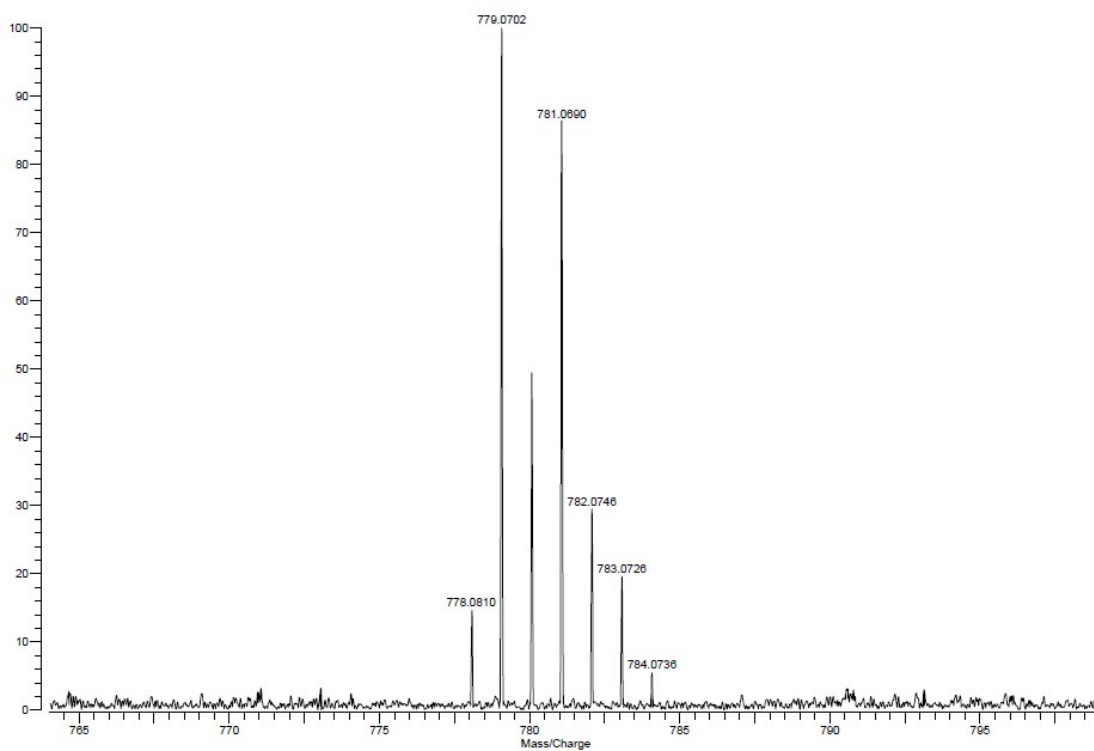

Figure S33. HRMS of **1c**.

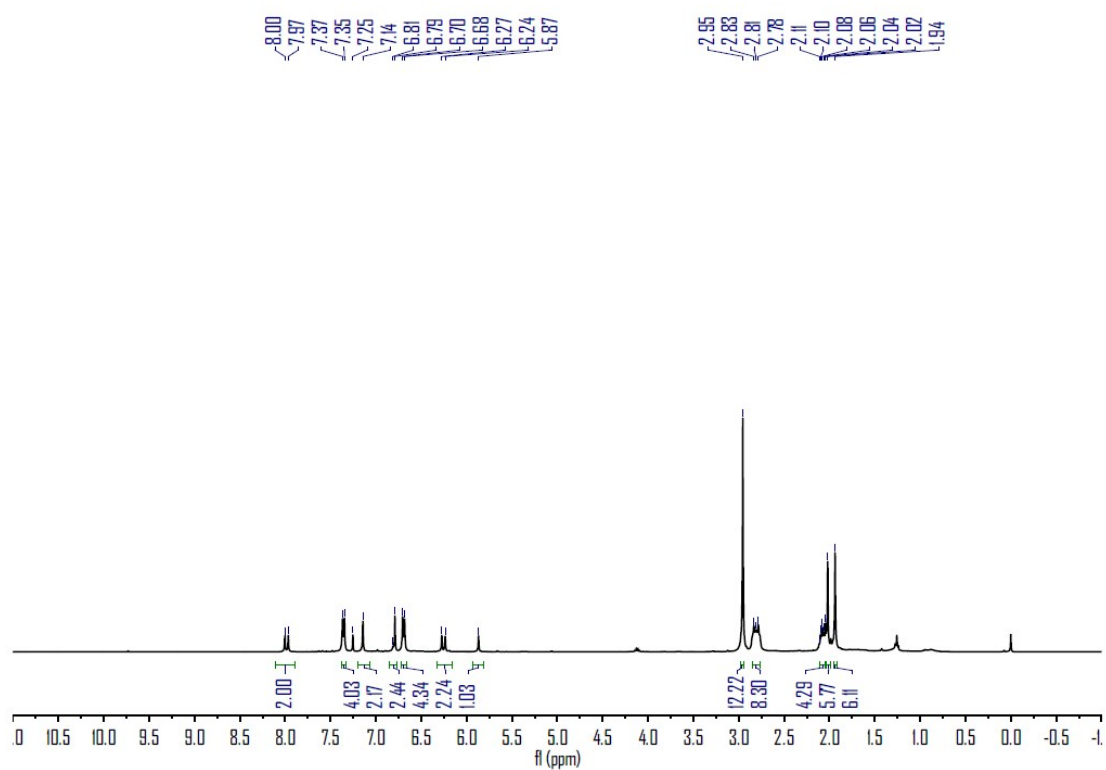

Figure S34. 400 MHz  $^1\text{H}$  NMR spectrum of **1d** in  $\text{CDCl}_3$  at room temperature.

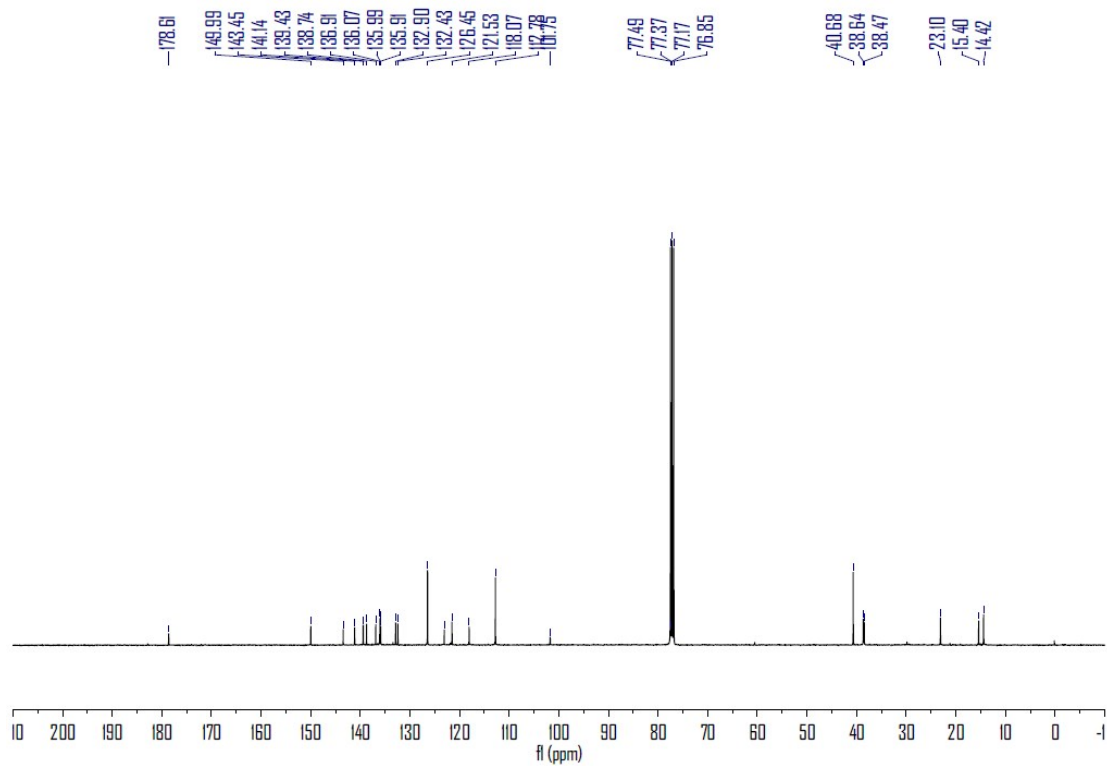

Figure S35. 100 MHz  $^{13}\text{C}$  NMR spectrum of **1d** in  $\text{CDCl}_3$  at room temperature.

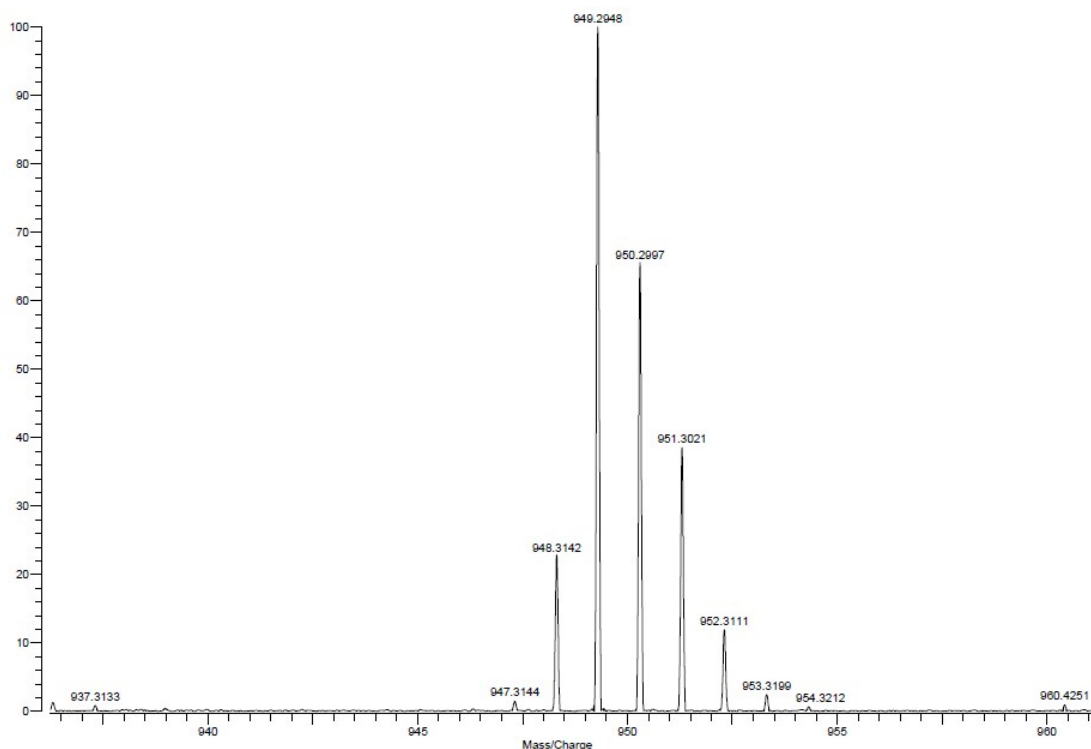

Figure S36. HRMS of 1d.

## 8. REFERENCES

- 1 Q. Zou, J. Jin, B. Xu, L. Ding and H. Tian, *Tetrahedron*, 2011, **67**, 915-921.
- 2 L. Hou, X. Zhang, T. C. Pijper, W. R. Browne and B. L. Feringa, *J. Am. Chem. Soc.*, 2014, **136**, 910-913.
- 3 M. Irie, T. Lifka, S. Kobatake and N. Kato, *J. Am. Chem. Soc.*, 2000, **122**, 4871-4876.
- 4 Gaussian 09, Revision B.01, M. J. Frisch, G. W. Trucks, H. B. Schlegel, G. E. Scuseria, M. A. Robb, J. R. Cheeseman, G. Scalmani, V. Barone, B. Mennucci, G. A. Petersson, H. Nakatsuji, M. Caricato, X. Li, H. P. Hratchian, A. F. Izmaylov, J. Bloino, G. Zheng, J. L. Sonnenberg, M. Hada, M. Ehara, K. Toyota, R. Fukuda, J. Hasegawa, M. Ishida, T. Nakajima, Y. Honda, O. Kitao, H. Nakai, T. Vreven, J. A. Montgomery, Jr., J. E. Peralta, F. Ogliaro, M. Bearpark, J. J. Heyd, E. Brothers, K. N. Kudin, V. N. Staroverov, T. Keith, R. Kobayashi, J. Normand, K. Raghavachari, A. Rendell, J. C. Burant, S. S. Iyengar, J. Tomasi, M. Cossi, N. Rega, J. M.

Millam, M. Klene, J. E. Knox, J. B. Cross, V. Bakken, C. Adamo, J. Jaramillo, R. Gomperts, R. E. Stratmann, O. Yazyev, A. J. Austin, R. Cammi, C. Pomelli, J. W. Ochterski, R. L. Martin, K. Morokuma, V. G. Zakrzewski, G. A. Voth, P. Salvador, J. J. Dannenberg, S. Dapprich, A. D. Daniels, O. Farkas, J. B. Foresman, J. V. Ortiz, J. Cioslowski and D. J. Fox, Gaussian, Inc., Wallingford CT, 2010.

5 A. D. Becke, *J. Chem. Phys.*, 1993, **98**, 5648-5652.

6 R. Ditchfield, W. J and J. A. Hehre, Pople, *J. Chem. Phys.*, 1971, **54**, 724-728.
